# Supplementary material for: Metabolic glycan labeling-assisted discovery of cell-surface markers for primary neural stem and progenitor cells
Source: Royal Society of Chemistry journal article supplement (doi:10.1039/c8cc01535j), 2018-01-01
Supplement: c8cc01535j1.pdf [file c8cc01535j1.pdf]

## **Supporting Information**

### **Metabolic Glycan Labeling-Assisted Discovery of Cell-Surface Markers for Primary Neural Stem and Progenitor Cells**

Qing-Ran Bai, Lu Dong, Yi Hao, Xing Chen\* and Qin Shen\*

|                              |            |
|------------------------------|------------|
| <b>Table of Contents</b>     |            |
| <b>Experiment Procedures</b> | <b>S3</b>  |
| <b>Supporting Figures</b>    | <b>S7</b>  |
| <b>Supporting Tables</b>     | <b>S14</b> |
| <b>Reference</b>             | <b>S48</b> |

## Experimental Procedures

**Materials.** Most reagents for cell culture were obtained from Life Technology, including DMEM, Fetal bovine serum (FBS), glutamine, sodium pyruvate, N2, B27, bFGF, 0.05% and 0.25% trypsin. Papain was purchased from Worthington. *N*-acetyl-L-cysteine (NAC), Poly-L-Lysine (PLL) and Triton X-100 were obtained from Sigma. TRIzol was obtained from Life Technology. 6-well plates and transwells were from Costar. Ac<sub>4</sub>ManNAz, 9AzSia and BTAA were synthesized as previously reported.<sup>[1] [2] [3]</sup> Alkyne-Biotin and alkyne-Cy5 were obtained from Click Chemistry Tools. The antibodies were stated in relative sections below.

**Animals.** ICR mice were obtained from Vital River Laboratory Animal Technology Company (Beijing, China). Mice were bred and maintained in the animal care facility at Center of Biomedical Analysis in Tsinghua University. All animal protocols used in this study were approved by the IACUC (Institutional Animal Care and Use Committee) of Tsinghua University and performed in accordance with guidelines of the IACUC. The laboratory animal facility has been accredited by AAALAC (Association for Assessment and Accreditation of Laboratory Animal Care International). For staging of embryos, mid-day of the vaginal plug identified was calculated as embryonic day 0.5 (E0.5).

**Cell culture.** Cell lines and primary cells were cultured in incubators at 37 °C with 5% CO<sub>2</sub>. For neural progenitor cell culture, embryonic day 10.5 (E10.5) ICR mouse embryos were dissected and the cortices were removed. The cortical tissues were digested with papain and dissociated into single cells, then plated into the PLL coated 6-well plates and cultured in adherent medium (AM) consisting of DMEM, glutamine, sodium pyruvate, N2, B27, NAC, and 10 ng/ml bFGF.<sup>[4]</sup>

The mouse brain endothelial cell line bEND3 cells and human embryonic kidney cell line 293FT were obtained from ATCC and maintained in DMEM with 10% FBS and passaged by 0.25% trypsin digestion.

For endothelial cell coculture experiment, bEND3 cells were plated into 24 mm transwell membrane inserts (Costar, 0.4 μm pore size) with DMEM supplemented with 10% FBS one day before coculture. 3 h after the cortical cells were plated on PLL-coated 6-well plates (Costar), the transwells were well rinsed with DMEM and the medium was switched to neural medium AM. The transwells were placed above neural culture so that endothelial cells and cortical cells were cocultured in AM without direct contact. The cortical neural cells were prepared for further analysis after 5 days.

**Metabolic labeling of cortical cell culture with unnatural sialic acid precursors.** Ac<sub>4</sub>ManNAz was dissolved in DMSO at the concentration of 200 mM. 9AzSia was dissolved in PBS at the concentration

of 100 mM. One day after neural cells plating, Ac<sub>4</sub>ManNAz or 9AzSia was added to the culture at the final concentration. DMSO was added into the control cultures.

**Fluorescence labeling of the azide-incorporated sialoproteins in cell culture.** The cell cultures treated with unnatural sialic acid precursor were rinsed once with PBS and fixed with 4% PFA in 0.1M PB for 15 min at RT. Cells were washed three times with PBS containing 1% FBS. Then, the cells were incubated for 10 min in PBS containing 50  $\mu$ M biotin-alkyne, 2.5 mM sodium ascorbate, and premixed BTAA-CuSO<sub>4</sub> complex (50  $\mu$ M CuSO<sub>4</sub>, BTAA: CuSO<sub>4</sub> in a 6:1 molar ratio). After the reaction, the cells were washed with PBS containing 1% FBS three times and incubated with 1  $\mu$ g/mL Alexa Fluor 647-streptavidin (Life Technology) for 30 min.

**Overexpressing HA-Igsf8 in 293FT cells.** Total RNA was purified from E14.5 mouse cortical tissue with TRIzol and retrotranscribed into cDNA with All-in-one RT Mastermix (Abm). Igsf8 was amplified with primer pair: 5'-GAATTCATGGGCGTCCCTAGCCCCACG-3' and 5'-GCGGCCGCACCGCTTCCGCATCCTCTTCAT-3', and then inserted into multicloning site of pLVX-IRES-ZsGreen1 (Clontech). Oligodeoxynucleotides encoding HA tag were synthesized and inserted into pLVX-IRES-ZsGreen1 so that HA tag was fused at C-terminal of Igsf8 protein. Such construct was transfected into 293FT cells with transfection reagent Neofect (Neofect).

**Immunofluorescence staining of culture and tissue sections.** The cells were fixed as mentioned above. The cells were blocked and permeabilized with blocking buffer (5% BSA, 0.3% Triton X-100 in PBS) for 15 min at RT, then incubated with indicated primary antibodies overnight at 4 °C followed by secondary antibodies incubation for 2 h at RT.

E14.5 ICR mouse embryonic heads were dissected out and fixed with 4% PFA in 0.1M PB overnight at 4 °C. After fixation, the heads were dehydrated with 30% sucrose in PBS and embedded in O.C.T. (Sakura) for cryosectioning. Brain sections were stained following the same procedure as cell culture staining.

The primary antibodies and their dilution ratio in blocking buffer for immunofluorescence staining are listed below: Nestin, 1:20 (Development Studies Hybridoma Bank); Tuj1, 1:1000 (Sigma), Tbr2, 1:200 (Abcam); Ctip2, 1:500 (Abcam); Ki67, 1:500 (Thermo); Igsf8, 1:100 (R&D); PSA-NCAM, 1:200 (Millipore), SNA, 1:20, Mal II, 1:100 (Vector Laboratories Inc.). The secondary antibodies (Alexa fluoro-conjugated, Life Technology) were used at a dilution of 1:1000. DAPI was used at the concentration of 500 ng/mL (Sigma).

Images of neural cell culture were acquired using an epifluorescence microscope (Zeiss Axio Imager D1). Images of sections were taken with a laser scanning confocal microscope (Zeiss LSM 710 Meta). The analysis of image data was performed with ImageJ software (NIH).

**Flow cytometry analysis.** Flow cytometry analysis was performed with BD Accuri C6 flow cytometer. Fluorescence activated cell sorting (FACS) was performed with BD Influx cell sorter. E14.5 ICR mouse cortices were dissected out and dissociated into single cells as mentioned above. The cells were resuspended in staining buffer (2% FBS in PBS) and stained with FITC conjugated anti-LeX antibody (BD, 1:200), and co-labeled with SNA, Mal II, and anti-PSA-NCAM (Millipore) for 30 min at 4 °C, then stained with Alexa Flour 647-conjugated streptavidin (1:100) or Alexa Flour 647-anti-mouse IgM (1:100) for 30 min at 4 °C before loading into cytometer for analysis. For FACS of Ac<sub>4</sub>ManNAz labeled cell culture, the E10.5 mouse embryonic cortical cells were cultured with Ac<sub>4</sub>ManNAz for 5 days and prepared into single cell solution with 0.05% trypsin. Then the cells were incubated for 10 min in PBS containing 50 μM biotin-alkyne, 2.5 mM sodium ascorbate, and premixed BTAA-CuSO<sub>4</sub> complex (50 μM CuSO<sub>4</sub>, BTAA: CuSO<sub>4</sub> in a 6:1 molar ratio). After the reaction, the cells were washed three times with PBS containing 1% FBS and incubated with 1 μg/mL Alexa Fluor 647-streptavidin for 30 min. After that, the cells were washed three times with PBS containing 1% FBS and subjected to FACS analysis. The data was analyzed by FlowJo software.

**Purification of Ac<sub>4</sub>ManNAz labeled sialylated glycoproteome.** For glycoproteomic identification, a reported procedure was used.<sup>[5]</sup> Briefly, after metabolic labeling, cells were rinsed three times with ice-cold PBS, lysed in RIPA buffer, and centrifuged at 10,000 × g for 10 min to remove cell debris. Protein concentration was determined using BCA assay. 1 mg of proteins in 1 mL RIPA buffer was incubated with 100 μM alkyne-biotin, premixed BTAA-CuSO<sub>4</sub> complex (100 μM CuSO<sub>4</sub>, BTAA: CuSO<sub>4</sub> at a molar ratio of 2:1), and 2.5 mM sodium ascorbate for 1 h. By adding 20 mL ice-cold methanol, the proteins were precipitated in - 30 °C overnight. The proteins were centrifuged at 4,500 × g for 15 min, and washed twice with 20 mL ice-cold methanol. The protein pellet was resuspended in 4 mL resuspension buffer [Solution A: 4% (wt/vol) SDS and 10 mM EDTA in H<sub>2</sub>O; Solution B: 1% (vol/vol) Brij 97, 150 mM NaCl and 50 mM Triethanolamine in H<sub>2</sub>O, pH = 7.4; A: B = 1:8 (vol/vol)]. 50 μL of streptavidin beads (Thermo Scientific) were washed three times with 1 mL PBS, and added to the protein solution. After 3h of incubation at RT, the beads were washed sequentially with 2% (wt/vol) SDS in PBS, 8 M urea with 250 mM ammonium bicarbonate (ABC), 2.5 M sodium chloride in PBS, 0.5 M ABC, 0.25 M ABC, and 0.05 M ABC. The beads were resuspended in 20 μL of 5 × loading buffer, heated for 10 min at 95 °C to release the enriched sialoglycoproteins and dissolved in 10% SDS-PAGE. Coomassie brilliant blue R-250 was used to display the distribution of the captured proteins in the gel.

**Western blot.** Western blot was performed according to standard protocol. The antibodies used and their dilution ratio was listed below: GAPDH, 1:5000 (Thermo), HA tag, 1:2000 (Sigma).

**In-gel fluorescence scanning.** The cell lysates were reacted with 50  $\mu$ M alkyne-Cy5 in 100  $\mu$ L reaction buffer containing premixed BTAA-CuSO<sub>4</sub> complex (50  $\mu$ M CuSO<sub>4</sub>, BTAA:CuSO<sub>4</sub> in a 2:1 molar ratio) and 2.5 mM freshly prepared sodium ascorbate. After 1h of reaction at 25°C, samples were resolved on 10% SDS-PAGE gels. The gels were scanned on a Typhoon FLA 9500 laser scanner (GE Healthcare, USA) using a 635 nm laser for excitation and LPR filter for detection.

**Proteomic analysis by LC-MS/MS.** Proteins samples were separated by SDS-PAGE gel and stained with Coomassie brilliant blue R-250. Each lane of the gel was sliced into 8 fractions, and gel slices were washed with Milli-Q water, destained with a 1:1 solution of 50 mM ABC/acetonitrile for 30 min at 37 °C, and dehydrated in 100% acetonitrile. The gel slices were rehydrated with 10 mM DTT in 50 mM ABC, and incubated for 45 min at 56 °C, then the slices were incubated with 55 mM iodoacetamide in 50 mM ABC for 45 min at RT in the dark. After dehydrated in 100% acetonitrile, gel pieces were rehydrated in a trypsin solution (2 ng/ $\mu$ L) and incubated at 37 °C for 16 h. The peptides were eluted in 50% acetonitrile in H<sub>2</sub>O with 5% (vol/vol) TFA (200  $\mu$ L, twice), and SpeedVac dried. Samples were then subjected to an Easy nLC 1000 coupled to an LTQ Velos Pro-Orbitrap Elite mass spectrometer (Thermo Fisher). Peptides were pressure-loaded onto a 100  $\mu$ m diameter, 2 cm C18 precolumn and separated on a 75  $\mu$ m diameter, 20 cm C18 capillary column with a gradient running from 95% buffer A [H<sub>2</sub>O with 0.1% formic acid] and 5% buffer B [CH<sub>3</sub>CN with 0.1% formic acid] to 35% B over 60 min at the flow rate of 300 nL/min, next ramping to 75% B over 2 min and holding at 75% B for 10 min. One full MS scan (375-1600 m/z) was followed by ten data-dependent scans of the nth most intense ions with dynamic exclusion enabled. Peptides were identified using Mascot version 2.3.02 (MatrixScience) and were searched against the SwissProt mouse sequence database to compile the data.

**Statistical analysis.** The data of image counting was statistically analyzed with Prism software. Unpaired t-test was applied to determine the significance of difference. P<0.05 was considered as statistically significant.

## Supporting Figures

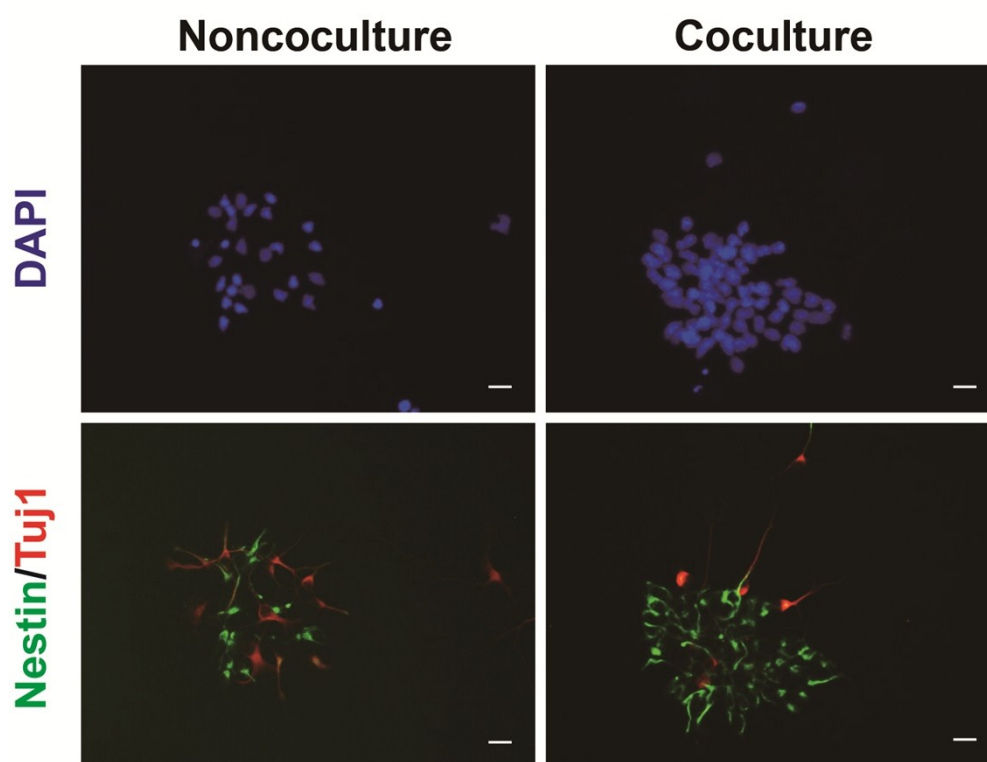

**Figure S1.** Immunostaining images of cortical cells after 5 days of culture.

Single NSCs isolated from E10.5 mouse cerebral cortex were cultured alone (Noncoculture) or with endothelial cells (Coculture). After 5 days, the cells were immunostained with antibodies against Nestin (green) and Tuj1 (red). The nuclei were stained with DAPI (blue). Scale bar, 20  $\mu$ m.

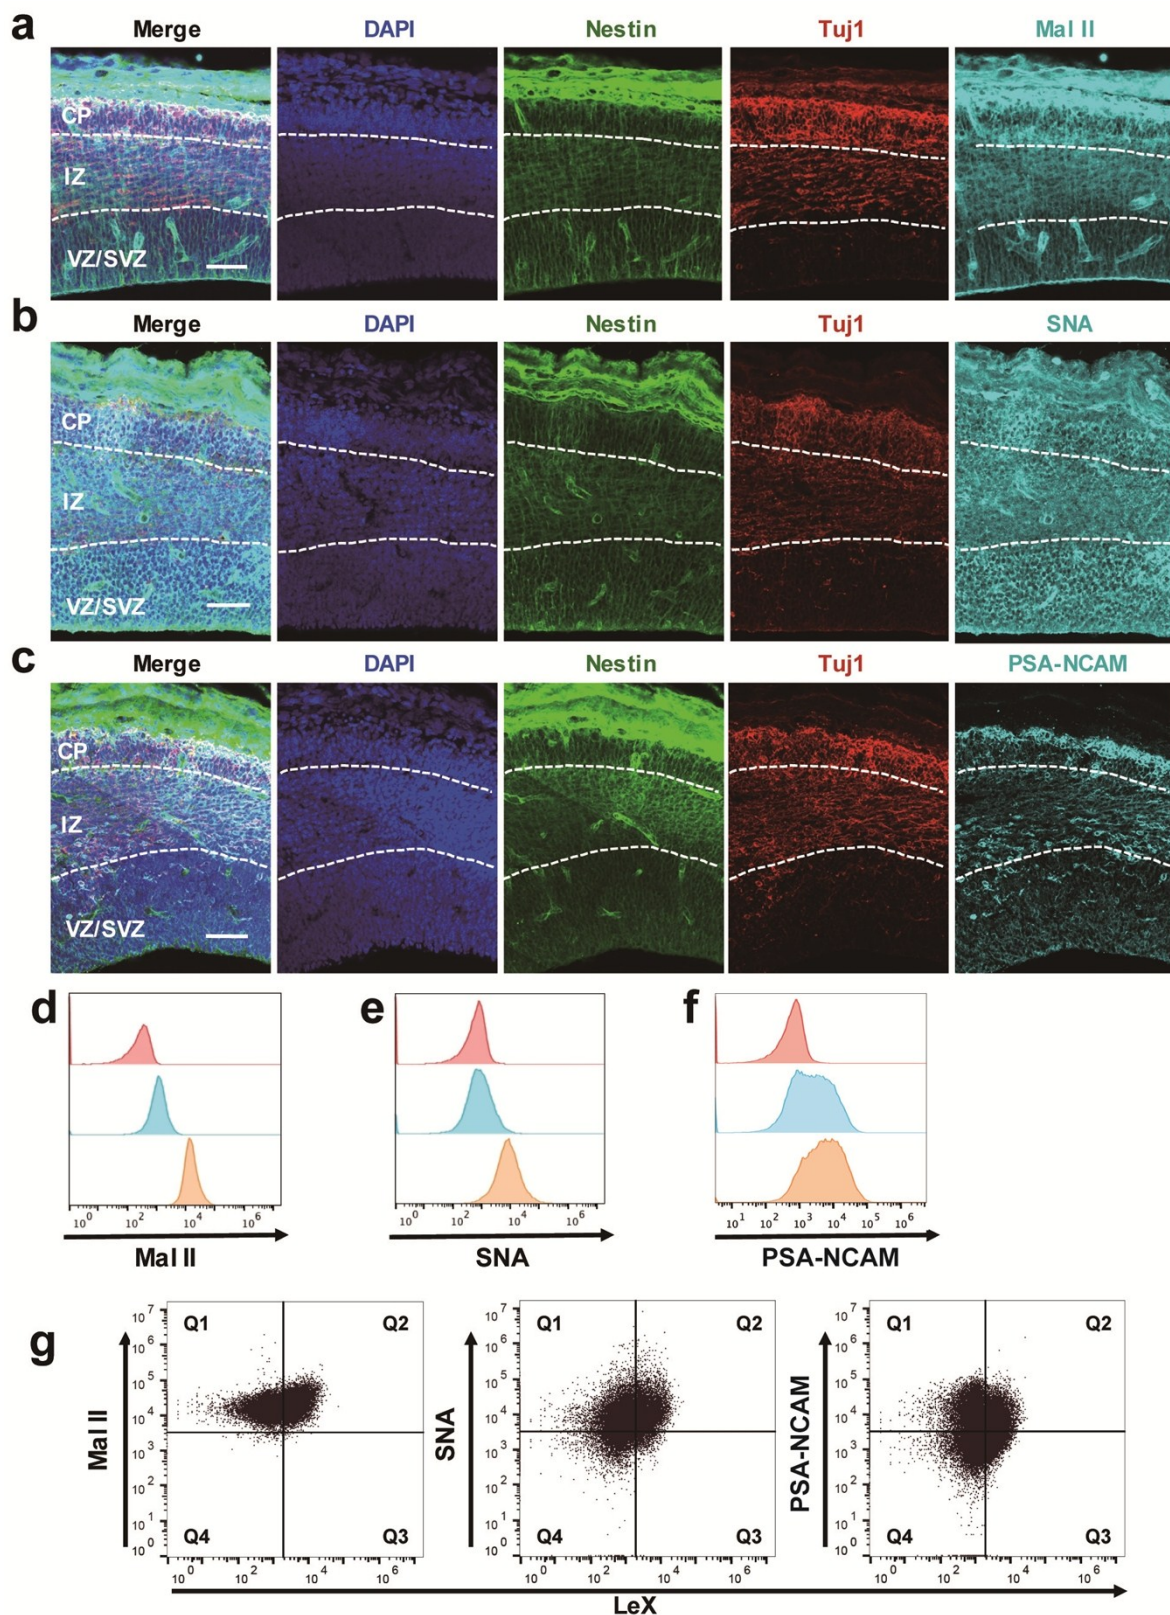

**Figure S2.** Distribution of sialoglycoproteins in the developing cerebral cortex.

a-c) Images of immunostaining for Nestin (green), Tuj1 (red) and Mal II (a), SNA (b), PSA-NCAM(c) in E14.5 cortical tissue sections. Nuclei were stained by DAPI. Scale bars, 50  $\mu$ m. Dashed lines demarcated different cortical regions. VZ, the ventricular zone. SVZ, the subventricular zone. IZ, the intermediate zone. CP, the cortical plate. d-f) FACS analysis of primary cortical cells isolated from E14.5 cortex. X-axis indicates the intensity of Cy5 conjugated Mal II (d), SNA (e) or antibody against PSA-NCAM (f).



Y-axis refers to the cell counts. Blue and orange peaks indicate low and high concentration, respectively. Red peaks indicate staining control. g) FACS analysis of E14.5 cortical cells labeled by high concentration of Mal II, SNA or PSA-NCAM antibody. The cells were co-labeled by a FITC-LeX antibody to distinguish LeX<sup>+</sup> and LeX<sup>-</sup> cell population. Points in Q4 quadrant indicate double negative populations.

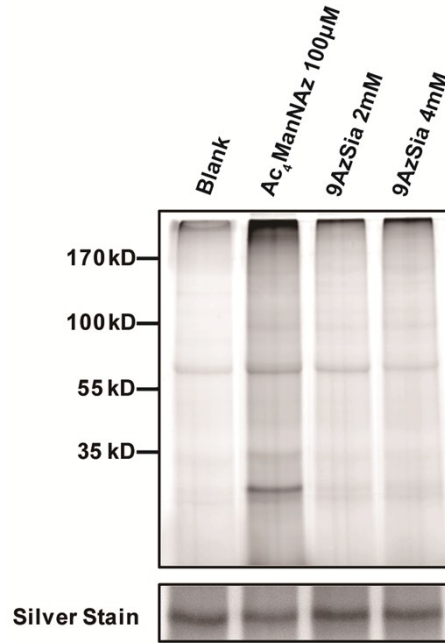

**Figure S3.** Ac<sub>4</sub>ManNAz efficiently labels primary NSCs compared to 9AzSia.

Primary NSCs isolated from the mouse cerebral cortex at E10.5 were cultured and labeled by Ac<sub>4</sub>ManNAz and 9AzSia with indicated concentration for 5 days. Then the cells were lysed and reacted with alkyne-Cy5 for in gel fluorescence assay. Silver staining of total proteins were used as internal control.

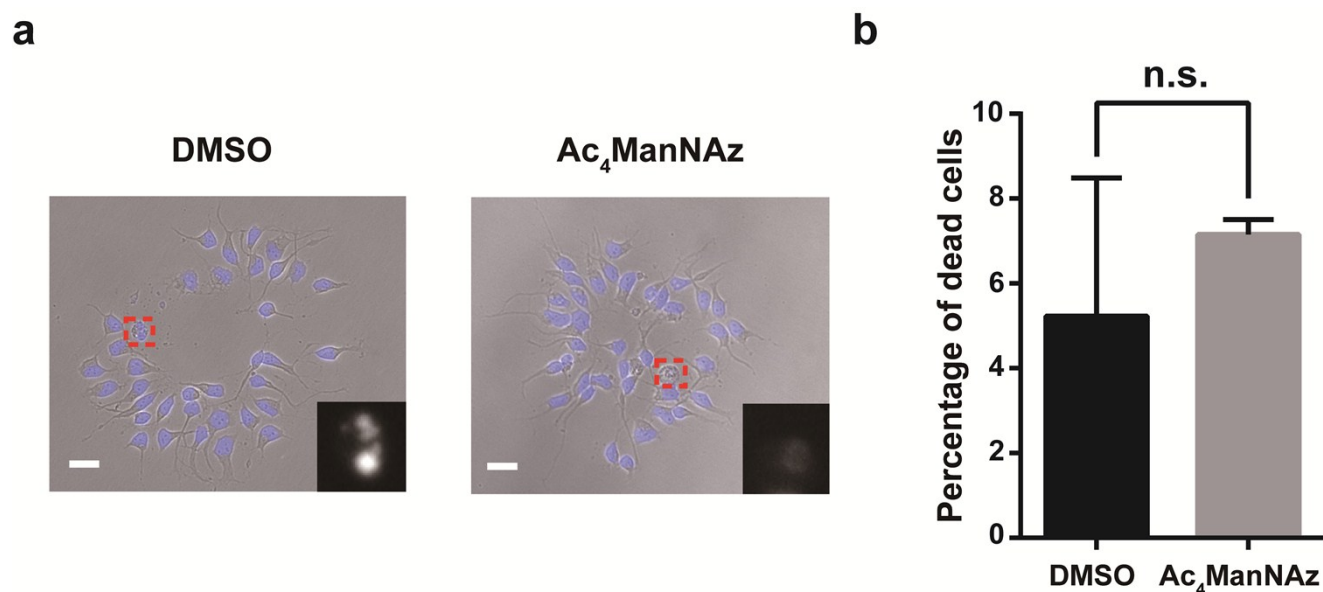

**Figure S4.** Toxicity of Ac<sub>4</sub>ManNAz labeling on primary neural stem and progenitor cells.

a) Phase-contrast and DAPI staining images of cultured cortical cells with or without the azidosugar. E10.5 primary neural stem and progenitor cells were isolated and cultured for 5 days with DMSO or 100  $\mu$ M Ac<sub>4</sub>ManNAz respectively. The cultures were fixed and stained with DAPI (blue). The inserts were the magnified view of red-dashed boxes indicated cells, showing disintegrated nuclei (DAPI signal in white color) of dead cells. Scale bars, 20  $\mu$ m. b) The statistic result of percentage of dead cells in cultures with DMSO or Ac<sub>4</sub>ManNAz. The dead cells were determined by combinatory evaluation of cell morphology under phase-contrast microscopy and DAPI fluorescent staining.<sup>[6]</sup>

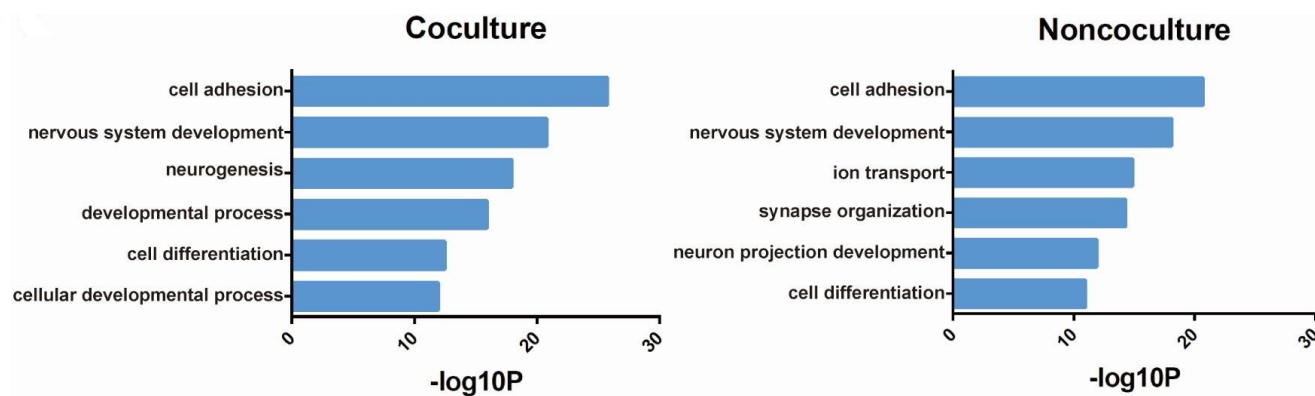

**Figure S5.** Gene ontology analysis of identified membrane sialoglycoproteins from the endothelial cocultured neural cells and noncocultured neural cells.

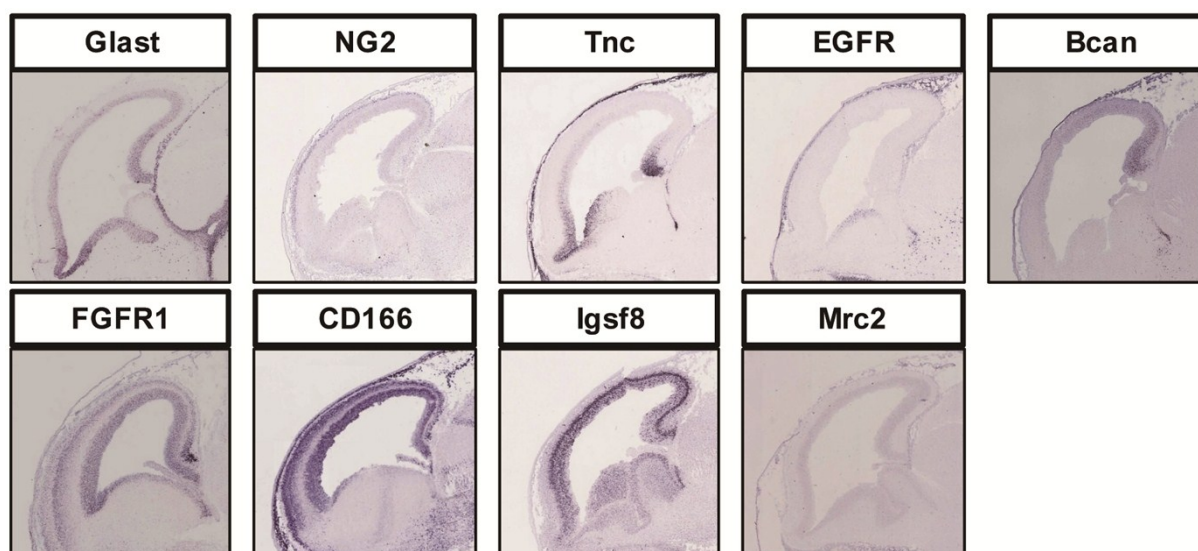

**Figure S6.** In situ hybridization of sialoglycoprotein candidates enriched in neural stem and progenitor cells shows mRNAs of these proteins are expressed in the cerebral cortex of E14.5 mouse brain. The images were adapted from Eurexpress.<sup>[7]</sup>

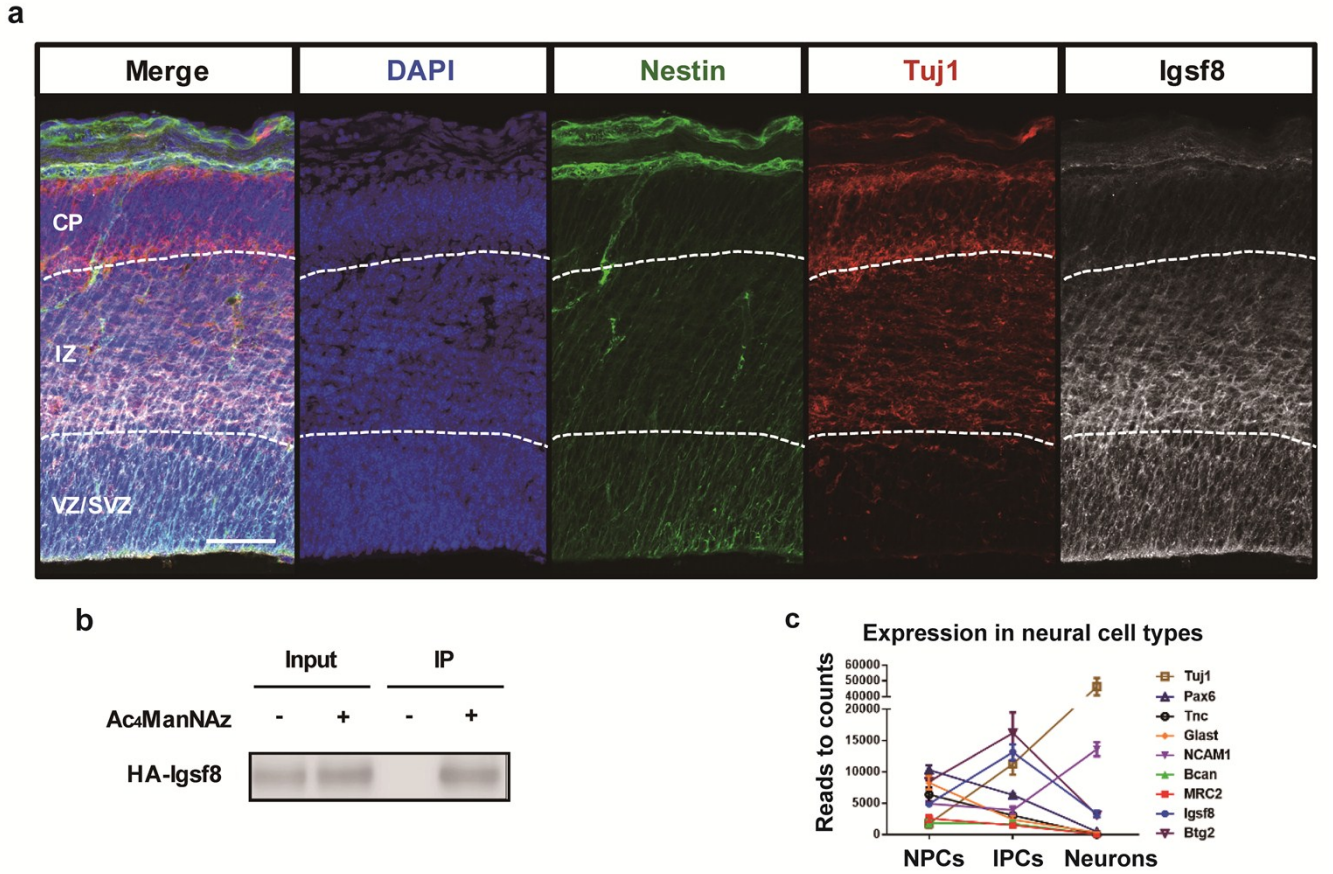

**Figure S7.** Expression of Igsf8 in E14.5 mouse cerebral cortex.

a) Images of E14.5 cortical tissue sections immunostained for Nestin (green), Tuj1 (red) and Igsf8 (grey). Nuclei were stained by DAPI (blue). Scale bar, 50  $\mu$ m. Dashed lines demarcated different cortical regions. VZ, the ventricular zone. SVZ, the subventricular zone. IZ, the intermediate zone. CP, the cortical plate.

b) Igsf8 is sialylated as shown by a pull-down assay using streptavidin beads after Ac<sub>4</sub>ManNAz labeling and click with alkyne-biotin in HA-Igsf8 overexpressing 293FT cells.

c) Igsf8 mRNA is highly expressed in Btg2<sup>+</sup> IPCs.<sup>[8]</sup>

## Supporting Table S1

High confidence proteins selectively identified in coculture or noncoculture samples by mass spectrometry. Proteins were categorized into the high-confidence list if they were identified in Ac<sub>4</sub>ManNAz treated samples with  $\geq 5$  spectral counts and  $\geq 5$  folds increase above the vehicle-administered samples. **Red** indicates proteins located in cell membrane, ER/Golgi or secreted pathway; **blue** indicated proteins located in cytosol, nucleus or mitochondria.

| Coculture                                             |           |     |     | Noncoculture                                                        |           |     |     |
|-------------------------------------------------------|-----------|-----|-----|---------------------------------------------------------------------|-----------|-----|-----|
| Protein Name                                          | Gene Name | NEG | POS | Protein Name                                                        | Gene Name | NEG | POS |
| Neural cell adhesion molecule 1                       | Ncam1     | 9   | 505 | Neural cell adhesion molecule 1                                     | Ncam1     | 11  | 532 |
| Prolow-density lipoprotein receptor-related protein 1 | Lrp1      | 7   | 272 | Prolow-density lipoprotein receptor-related protein 1               | Lrp1      | 12  | 255 |
| Golgi apparatus protein 1                             | Glg1      | 13  | 79  | Glypican-2                                                          | Gpc2      | 0   | 82  |
| Leucine-rich repeat-containing protein 4B             | Lrrc4b    | 1   | 72  | Golgi apparatus protein 1                                           | Glg1      | 4   | 75  |
| Sodium/potassium-transporting ATPase subunit beta-1   | Atp1b1    | 6   | 70  | Reticulon-4                                                         | Rtn4      | 11  | 74  |
| Neuronal membrane glycoprotein M6-a                   | Gpm6a     | 4   | 68  | Sodium/potassium-transporting ATPase subunit beta-1                 | Atp1b1    | 8   | 67  |
| Cation-independent mannose-6-phosphate receptor       | Igf2r     | 0   | 67  | Ephrin-B1                                                           | Efnb1     | 9   | 63  |
| Plexin-B1                                             | Plxnb1    | 0   | 66  | Leucine-rich repeat-containing protein 4B                           | Lrrc4b    | 1   | 62  |
| Ephrin-B1                                             | Efnb1     | 9   | 62  | Neuronal membrane glycoprotein M6-a                                 | Gpm6a     | 3   | 62  |
| Excitatory amino acid transporter 1                   | Slc1a3    | 4   | 61  | 4F2 cell-surface antigen heavy chain                                | Slc3a2    | 7   | 61  |
| Neuronal cell adhesion molecule                       | Nrcam     | 2   | 60  | Neurologin-3                                                        | Nlgn3     | 1   | 58  |
| Synaptic vesicle glycoprotein 2A                      | Sv2a      | 1   | 57  | Plexin-B1                                                           | Plxnb1    | 1   | 57  |
| Neurologin-2                                          | Nlgn2     | 0   | 51  | Cation-independent mannose-6-phosphate receptor                     | Igf2r     | 0   | 52  |
| Glypican-2                                            | Gpc2      | 0   | 50  | Glypican-4                                                          | Gpc4      | 2   | 48  |
| Contactin-1                                           | Cntn1     | 5   | 49  | Agrin                                                               | Agrn      | 0   | 47  |
| Low-density lipoprotein receptor                      | Ldlr      | 2   | 47  | Neuronal cell adhesion molecule                                     | Nrcam     | 2   | 41  |
| Netrin receptor DCC                                   | Dcc       | 2   | 47  | Cell adhesion molecule 4                                            | Cadm4     | 0   | 41  |
| Neurologin-3                                          | Nlgn3     | 3   | 46  | Neurologin-2                                                        | Nlgn2     | 0   | 40  |
| V-type proton ATPase 116 kDa subunit a isoform 1      | Atp6v0a1  | 3   | 46  | Immunoglobulin superfamily containing leucine-rich repeat protein 2 | Islr2     | 1   | 38  |

|                                                                     |         |   |    |                                                           |          |   |    |
|---------------------------------------------------------------------|---------|---|----|-----------------------------------------------------------|----------|---|----|
| Immunoglobulin superfamily containing leucine-rich repeat protein 2 | Islr2   | 0 | 46 | V-type proton ATPase 116 kDa subunit a isoform 1          | Atp6v0a1 | 7 | 37 |
| Receptor-type tyrosine-protein phosphatase alpha                    | Ptptra  | 1 | 45 | Coxsackievirus and adenovirus receptor homolog            | Cxadr    | 0 | 37 |
| Coxsackievirus and adenovirus receptor homolog                      | Cxadr   | 1 | 44 | Sodium/potassium-transporting ATPase subunit beta-3       | Atp1b3   | 0 | 37 |
| Sodium- and chloride-dependent GABA transporter 3                   | Slc6a11 | 4 | 44 | Transferrin receptor protein 1                            | Tfrc     | 1 | 36 |
| Integrin beta-1                                                     | Itgb1   | 2 | 42 | Netrin receptor DCC                                       | Dcc      | 5 | 36 |
| Transferrin receptor protein 1                                      | Tfrc    | 4 | 39 | Immunoglobulin superfamily member 3                       | Igsf3    | 0 | 35 |
| Neurofascin                                                         | Nfasc   | 0 | 38 | Insulin-like growth factor 1 receptor                     | Igflr    | 0 | 35 |
| Neogenin                                                            | Neo1    | 0 | 35 | Carboxypeptidase D                                        | Cpd      | 0 | 34 |
| Sodium/potassium-transporting ATPase subunit beta-3                 | Atp1b3  | 0 | 34 | Neogenin                                                  | Neo1     | 0 | 34 |
| Integrin alpha-6                                                    | Itga6   | 3 | 33 | Receptor-type tyrosine-protein phosphatase alpha          | Ptptra   | 0 | 34 |
| Immunoglobulin superfamily member 3                                 | Igsf3   | 0 | 33 | Protocadherin Fat 3                                       | Fat3     | 1 | 32 |
| Versican core protein                                               | Vcan    | 0 | 33 | Lactadherin                                               | Mfge8    | 0 | 32 |
| Neuronal membrane glycoprotein M6-b                                 | Gpm6b   | 2 | 32 | Synaptic vesicle glycoprotein 2A                          | Sv2a     | 1 | 31 |
| Cell adhesion molecule 4                                            | Cadm4   | 0 | 32 | Voltage-dependent calcium channel subunit alpha-2/delta-1 | Cacna2d1 | 0 | 30 |
| Neural cell adhesion molecule 2                                     | Ncam2   | 0 | 32 | UPF0635 protein C6orf134 homolog                          |          | 3 | 29 |
| Glypican-4                                                          | Gpc4    | 1 | 31 | Ephrin-B2                                                 | Efnb2    | 0 | 29 |
| Carboxypeptidase D                                                  | Cpd     | 0 | 31 | Transmembrane 9 superfamily member 3                      | Tm9sf3   | 0 | 28 |
| Neural cell adhesion molecule L1                                    | L1cam   | 0 | 31 | Excitatory amino acid transporter 1                       | Slc1a3   | 0 | 27 |
| Sodium- and chloride-dependent taurine transporter                  | Slc6a6  | 2 | 30 | Neuropilin-2                                              | Nrp2     | 0 | 27 |
| Chondroitin sulfate proteoglycan 4                                  | Cspg4   | 0 | 30 | Solute carrier family 12 member 5                         | Slc12a5  | 0 | 27 |
| Reticulon-1                                                         | Rtn1    | 2 | 29 | Plexin-A2                                                 | Plxna2   | 1 | 26 |
| Ephrin type-B receptor 2                                            | Ephb2   | 0 | 29 | Cadherin-2                                                | Cdh2     | 0 | 26 |
| Lactadherin                                                         | Mfge8   | 0 | 29 | Integrin beta-1                                           | Itgb1    | 0 | 26 |
| Neuropilin-2                                                        | Nrp2    | 0 | 29 | Neuronal membrane glycoprotein M6-b                       | Gpm6b    | 0 | 26 |
| Solute carrier family 2, facilitated glucose transporter member 1   | Slc2a1  | 2 | 28 | Sodium- and chloride-dependent GABA transporter 3         | Slc6a11  | 3 | 25 |
| Agrin                                                               | Agrn    | 0 | 28 | Contactin-1                                               | Cntn1    | 1 | 24 |



|                                                                      |          |   |    |                                                                      |        |   |    |
|----------------------------------------------------------------------|----------|---|----|----------------------------------------------------------------------|--------|---|----|
| Cadherin-2                                                           | Cdh2     | 0 | 28 | Secreted frizzled-related protein 1                                  | Sfrp1  | 1 | 24 |
| Delta and Notch-like epidermal growth factor-related receptor        | Dner     | 0 | 28 | Lysosome membrane protein 2                                          | Scarb2 | 0 | 24 |
| Glucosylceramidase                                                   | Gba      | 0 | 26 | TM2 domain-containing protein 2                                      | Tm2d2  | 0 | 24 |
| Solute carrier family 12 member 5                                    | Slc12a5  | 0 | 26 | Ephrin type-B receptor 2                                             | Ephb2  | 0 | 23 |
| Roundabout homolog 2                                                 | Robo2    | 2 | 25 | Glypican-1                                                           | Gpc1   | 0 | 23 |
| Protocadherin Fat 3                                                  | Fat3     | 0 | 25 | Insulin receptor                                                     | Insr   | 0 | 23 |
| EGF-like repeat and discoidin I-like domain-containing protein 3     | Edil3    | 0 | 24 | Integrin alpha-6                                                     | Itga6  | 0 | 23 |
| Nicastrin                                                            | Ncstn    | 1 | 23 | Glucosylceramidase                                                   | Gba    | 4 | 22 |
| BDNF/NT-3 growth factors receptor                                    | Ntrk2    | 0 | 23 | Neurofascin                                                          | Nfasc  | 0 | 22 |
| Chloride transport protein 6                                         | Clcn6    | 0 | 23 | Solute carrier family 2, facilitated glucose transporter member 1    | Slc2a1 | 0 | 22 |
| Latrophilin-3                                                        | Lphn3    | 0 | 23 | Nicastrin                                                            | Ncstn  | 1 | 20 |
| Voltage-dependent calcium channel subunit alpha-2/delta-1            | Cacna2d1 | 0 | 23 | EGF-like repeat and discoidin I-like domain-containing protein 3     | Edil3  | 0 | 20 |
| Large neutral amino acids transporter small subunit 1                | Slc7a5   | 1 | 22 | Latrophilin-3                                                        | Lphn3  | 0 | 20 |
| Cell adhesion molecule 2                                             | Cadm2    | 0 | 22 | Prominin-1                                                           | Prom1  | 0 | 20 |
| Excitatory amino acid transporter 2                                  | Slc1a2   | 0 | 21 | SLIT-ROBO Rho GTPase-activating protein 2                            | Srgap2 | 1 | 19 |
| Sulfhydryl oxidase 2                                                 | Qsox2    | 0 | 21 | Reticulon-1                                                          | Rtn1   | 3 | 18 |
| Basement membrane-specific heparan sulfate proteoglycan core protein | Hspg2    | 0 | 20 | Chloride transport protein 6                                         | Clcn6  | 0 | 18 |
| CD166 antigen                                                        | Alcam    | 0 | 19 | Neurocan core protein                                                | Ncan   | 0 | 18 |
| Leucyl-cystinyl aminopeptidase                                       | Lnpep    | 0 | 19 | Transmembrane protein 2                                              | Tmem2  | 0 | 18 |
| Neutral amino acid transporter A                                     | Slc1a4   | 0 | 19 | Versican core protein                                                | Vcan   | 0 | 18 |
| Anoctamin-6                                                          | Ano6     | 0 | 18 | Anoctamin-6                                                          | Ano6   | 0 | 17 |
| Leucine-rich repeat-containing protein 8A                            | Lrrc8a   | 0 | 18 | Leucine-rich repeat-containing protein 8A                            | Lrrc8a | 0 | 17 |
| Lymphocyte antigen 6H                                                | Ly6h     | 0 | 18 | Neural cell adhesion molecule L1                                     | L1cam  | 0 | 17 |
| Lysosomal acid phosphatase                                           | Acp2     | 0 | 18 | Sodium- and chloride-dependent GABA transporter 1                    | Slc6a1 | 1 | 16 |
| Lysosome membrane protein 2                                          | Scarb2   | 0 | 18 | Basement membrane-specific heparan sulfate proteoglycan core protein | Hspg2  | 0 | 16 |

|                                                   |           |   |    |                                                       |         |   |    |
|---------------------------------------------------|-----------|---|----|-------------------------------------------------------|---------|---|----|
| Neurocan core protein                             | Ncan      | 0 | 18 | Basigin                                               | Bsg     | 0 | 16 |
| Neuroplastin                                      | Nptn      | 0 | 18 | Ephrin-B3                                             | Efnb3   | 0 | 16 |
| Protein CASC4                                     | Casc4     | 0 | 18 | Lysosomal acid phosphatase                            | Acp2    | 0 | 16 |
| Receptor-type tyrosine-protein phosphatase gamma  | Ptprg     | 0 | 18 | Neutral amino acid transporter A                      | Slc1a4  | 0 | 16 |
| Epidermal growth factor receptor                  | Egfr      | 1 | 17 | Cadherin EGF LAG seven-pass G-type receptor 3         | Celsr3  | 0 | 15 |
| Tyrosine-protein kinase-like 7                    | Ptk7      | 2 | 17 | Ciliary neurotrophic factor receptor subunit alpha    | Cntfr   | 0 | 15 |
| Limbic system-associated membrane protein         | Lsamp     | 0 | 17 | GPI inositol-deacylase                                | Pgap1   | 0 | 15 |
| Sodium bicarbonate cotransporter 3                | Slc4a7    | 0 | 17 | G-protein coupled receptor 56                         | Gpr56   | 0 | 15 |
| Astrotactin-1                                     | Astn1     | 1 | 16 | Immunoglobulin superfamily DCC subclass member 4      | Igdcc4  | 0 | 15 |
| OX-2 membrane glycoprotein                        | Cd200     | 2 | 16 | Integrin alpha-V                                      | Itgav   | 0 | 15 |
| Sodium- and chloride-dependent GABA transporter 1 | Slc6a1    | 2 | 16 | Neural cell adhesion molecule 2                       | Ncam2   | 0 | 15 |
| Tenascin                                          | Tnc       | 2 | 16 | Sphingomyelin phosphodiesterase 2                     | Smpd2   | 0 | 15 |
| SLIT-ROBO Rho GTPase-activating protein 2         | Srgap2    | 3 | 16 | Alpha-mannosidase 2C1                                 | Man2c1  | 1 | 14 |
| G-protein coupled receptor 56                     | Gpr56     | 0 | 16 | BDNF/NT-3 growth factors receptor                     | Ntrk2   | 0 | 14 |
| Immunoglobulin superfamily DCC subclass member 4  | Igdcc4    | 0 | 16 | Cell adhesion molecule 2                              | Cadm2   | 0 | 14 |
| Immunoglobulin superfamily member 21              | Igsf21    | 0 | 16 | Cell adhesion molecule 3                              | Cadm3   | 0 | 14 |
| Prominin-1                                        | Prom1     | 0 | 16 | Latrophilin-1                                         | Lphn1   | 0 | 14 |
| Synaptotagmin-1                                   | Syt1      | 0 | 16 | Neuroplastin                                          | Nptn    | 0 | 14 |
| Cell cycle control protein 50A                    | Tmem30a   | 0 | 15 | Podocalyxin-like protein 2                            | Podxl2  | 0 | 14 |
| Electrogenic sodium bicarbonate cotransporter 1   | Slc4a4    | 0 | 15 | Tyrosine-protein kinase-like 7                        | Ptk7    | 1 | 13 |
| Insulin-like growth factor 1 receptor             | Igf1r     | 0 | 15 | KLRAQ motif-containing protein 1                      | Klraql  | 2 | 13 |
| Integrin alpha-5                                  | Itga5     | 0 | 15 | Cell cycle control protein 50A                        | Tmem30a | 0 | 13 |
| Transmembrane 9 superfamily member 3              | Tm9sf3    | 0 | 15 | Glypican-6                                            | Gpc6    | 0 | 13 |
| Uncharacterized protein KIAA0319-like             | Kiaa0319l | 0 | 15 | Large neutral amino acids transporter small subunit 1 | Slc7a5  | 0 | 13 |
| Cell adhesion molecule 3                          | Cadm3     | 0 | 14 | Plexin-A1                                             | Plxna1  | 0 | 13 |
| Ephrin-B2                                         | Efnb2     | 0 | 14 | Protein CASC4                                         | Casc4   | 0 | 13 |
| Leucine-rich repeat and immunoglobulin-like       | Lingo1    | 0 | 14 | Sodium bicarbonate cotransporter 3                    | Slc4a7  | 0 | 13 |

|                                                       |         |   |    |                                                               |         |   |    |
|-------------------------------------------------------|---------|---|----|---------------------------------------------------------------|---------|---|----|
| domain-containing nogo receptor-interacting protein 1 |         |   |    |                                                               |         |   |    |
| Podocalyxin-like protein 2                            | Podxl2  | 0 | 14 | Trophoblast glycoprotein                                      | Tpbg    | 0 | 13 |
| Transmembrane emp24 domain-containing protein 4       | Tmed4   | 0 | 14 | Niemann-Pick C1 protein                                       | Npc1    | 1 | 12 |
| Basigin                                               | Bsg     | 1 | 13 | Phospholipase D3                                              | Pld3    | 2 | 12 |
| Transmembrane emp24 domain-containing protein 9       | Tmed9   | 1 | 13 | Astrotactin-1                                                 | Astn1   | 0 | 12 |
| Integrin alpha-V                                      | Itgav   | 0 | 13 | Delta and Notch-like epidermal growth factor-related receptor | Dner    | 0 | 12 |
| Low-density lipoprotein receptor-related protein 8    | Lrp8    | 0 | 13 | Disks large-associated protein 4                              | Dlgap4  | 0 | 12 |
| Neuropilin-1                                          | Nrp1    | 0 | 13 | Glutamate receptor 1                                          | Gria1   | 0 | 12 |
| Repulsive guidance molecule A                         | Rgma    | 0 | 13 | Glutamate receptor 2                                          | Gria2   | 0 | 12 |
| Reticulon-4 receptor-like 2                           | Rtn4rl2 | 0 | 13 | Leucyl-cystinyl aminopeptidase                                | Lnpep   | 0 | 12 |
| Seizure protein 6                                     | Sez6    | 0 | 13 | Low-density lipoprotein receptor                              | Ldlr    | 0 | 12 |
| Solute carrier family 12 member 7                     | Slc12a7 | 0 | 13 | Neurotrimin                                                   | Ntm     | 0 | 12 |
| Solute carrier family 12 member 9                     | Slc12a9 | 0 | 13 | Phosphatidylinositol-binding clathrin assembly protein        | Picalm  | 0 | 12 |
| Trophoblast glycoprotein                              | Tpbg    | 0 | 13 | Synaptotagmin-1                                               | Syt1    | 0 | 12 |
| Lysosome-associated membrane glycoprotein 2           | Lamp2   | 1 | 12 | Excitatory amino acid transporter 2                           | Slc1a2  | 0 | 11 |
| Amyloid beta A4 protein                               | App     | 0 | 12 | Poliovirus receptor-related protein 2                         | Pvr12   | 0 | 11 |
| Golgi integral membrane protein 4                     | Golim4  | 0 | 12 | Reticulon-4 receptor-like 2                                   | Rtn4rl2 | 0 | 11 |
| High affinity cationic amino acid transporter 1       | Slc7a1  | 0 | 12 | Uncharacterized protein C17orf68 homolog                      |         | 0 | 11 |
| Inositol monophosphatase 3                            | Impad1  | 0 | 12 | Lymphocyte antigen 6H                                         | Ly6h    | 1 | 10 |
| Neurotrimin                                           | Ntm     | 0 | 12 | Integrin alpha-5                                              | Itga5   | 0 | 10 |
| Niemann-Pick C1 protein                               | Npc1    | 0 | 12 | Latrophilin-2 (Fragment)                                      | Lphn2   | 0 | 10 |
| Plexin-A2                                             | Plxna2  | 0 | 12 | Protein shisa-6-like                                          |         | 0 | 10 |
| Poliovirus receptor-related protein 2                 | Pvr12   | 0 | 12 | SLIT and NTRK-like protein 4                                  | Slitrk4 | 0 | 10 |
| Protein tweety homolog 1                              | Ttyh1   | 0 | 12 | Sodium- and chloride-dependent creatine transporter 1         | Slc6a8  | 0 | 10 |
| Sodium/potassium-transporting ATPase subunit beta-2   | Atp1b2  | 0 | 12 | Sodium-coupled neutral amino acid transporter 2               | Slc38a2 | 0 | 10 |
| Solute carrier family 12 member 2                     | Slc12a2 | 0 | 12 | SPARC-related modular calcium-binding protein 1               | Smoc1   | 0 | 10 |

|                                                                        |         |   |    |                                                                        |           |   |    |
|------------------------------------------------------------------------|---------|---|----|------------------------------------------------------------------------|-----------|---|----|
| Alkaline phosphatase, tissue-nonspecific isozyme                       | Alpl    | 0 | 11 | Tetraspanin-6                                                          | Tspan6    | 0 | 10 |
| Alpha-1,6-mannosyl-glycoprotein 2-beta-N-acetylglucosaminyltransferase | Mgat2   | 0 | 11 | Tetraspanin-7                                                          | Tspan7    | 0 | 10 |
| Contactin-4                                                            | Cntn4   | 0 | 11 | Uncharacterized protein KIAA0319-like                                  | Kiaa0319l | 0 | 10 |
| Glypican-1                                                             | Gpc1    | 0 | 11 | Alpha-1,6-mannosyl-glycoprotein 2-beta-N-acetylglucosaminyltransferase | Mgat2     | 0 | 9  |
| Immunoglobulin superfamily member 8                                    | Igsf8   | 0 | 11 | Armadillo repeat-containing protein 10                                 | Armc10    | 0 | 9  |
| Latrophilin-2 (Fragment)                                               | Lphn2   | 0 | 11 | Contactin-6                                                            | Cntn6     | 0 | 9  |
| Neurexin-1-alpha                                                       | Nrxn1   | 0 | 11 | Ganglioside-induced differentiation-associated protein 1-like 1        | Gdap1l1   | 0 | 9  |
| Neuronal growth regulator 1                                            | Negr1   | 0 | 11 | Low-density lipoprotein receptor-related protein 8                     | Lrp8      | 0 | 9  |
| Protein tweety homolog 3                                               | Ttyh3   | 0 | 11 | OX-2 membrane glycoprotein                                             | Cd200     | 0 | 9  |
| Solute carrier family 23 member 2                                      | Slc23a2 | 0 | 11 | Protein tweety homolog 1                                               | Ttyh1     | 0 | 9  |
| Tetraspanin-6                                                          | Tspan6  | 0 | 11 | Protocadherin Fat 4                                                    | Fat4      | 0 | 9  |
| Armadillo repeat-containing protein 10                                 | Armc10  | 1 | 10 | Seizure 6-like protein 2                                               | Sez6l2    | 0 | 9  |
| Alpha-type platelet-derived growth factor receptor                     | Pdgfra  | 0 | 10 | SLIT and NTRK-like protein 1                                           | Slitrk1   | 0 | 9  |
| Cell adhesion molecule 1                                               | Cadm1   | 0 | 10 | Solute carrier family 12 member 2                                      | Slc12a2   | 0 | 9  |
| Ciliary neurotrophic factor receptor subunit alpha                     | Cntfr   | 0 | 10 | Solute carrier family 12 member 7                                      | Slc12a7   | 0 | 9  |
| Contactin-6                                                            | Cntn6   | 0 | 10 | Solute carrier family 23 member 2                                      | Slc23a2   | 0 | 9  |
| Latrophilin-1                                                          | Lphn1   | 0 | 10 | Transmembrane emp24 domain-containing protein 4                        | Tmed4     | 0 | 9  |
| Polypeptide N-acetylgalactosaminyltransferase 1                        | Galnt1  | 0 | 10 | Transmembrane emp24 domain-containing protein 9                        | Tmed9     | 0 | 9  |
| Seizure 6-like protein 2                                               | Sez6l2  | 0 | 10 | Sodium- and chloride-dependent taurine transporter                     | Slc6a6    | 1 | 8  |
| Sodium- and chloride-dependent creatine transporter 1                  | Slc6a8  | 0 | 10 | Uncharacterized protein C6orf174 homolog                               |           | 1 | 8  |
| Sodium/myo-inositol cotransporter                                      | Slc5a3  | 0 | 10 | Ephrin type-A receptor 4                                               | Epha4     | 0 | 8  |
| Tetraspanin-7                                                          | Tspan7  | 0 | 10 | Neuroigin-1                                                            | Nlgn1     | 0 | 8  |
| Ephrin type-A receptor 4                                               | Epha4   | 0 | 9  | Neuronal growth regulator 1                                            | Negr1     | 0 | 8  |
| Ephrin-B3                                                              | Efnb3   | 0 | 9  | Pannexin-1                                                             | Panx1     | 0 | 8  |
| Gamma-glutamyltransferase 7                                            | Ggt7    | 0 | 9  | Protein FAM3C                                                          | Fam3c     | 0 | 8  |
| Leucine-rich repeat neuronal protein 1                                 | Lrrn1   | 0 | 9  | Seizure protein 6                                                      | Sez6      | 0 | 8  |
| Receptor-type tyrosine-protein phosphatase eta                         | Ptpnj   | 0 | 9  | Sulfhydryl oxidase 2                                                   | Qsox2     | 0 | 8  |

|                                                    |          |   |   |                                                      |          |   |   |
|----------------------------------------------------|----------|---|---|------------------------------------------------------|----------|---|---|
| Transmembrane protein 2                            | Tmem2    | 0 | 9 | Transmembrane protein 33                             | Tmem33   | 0 | 8 |
| Brevican core protein                              | Bcan     | 1 | 8 | SLIT-ROBO Rho GTPase-activating protein 3            | Srgap3   | 1 | 7 |
| UPF0635 protein C6orf134 homolog                   |          | 1 | 8 | Dystroglycan                                         | Dag1     | 0 | 7 |
| Cadherin EGF LAG seven-pass G-type receptor 3      | Celsr3   | 0 | 8 | Frizzled-2                                           | Fzd2     | 0 | 7 |
| CD44 antigen                                       | Cd44     | 0 | 8 | Galectin-1                                           | Lgals1   | 0 | 7 |
| Choline transporter-like protein 2                 | Slc44a2  | 0 | 8 | High affinity cationic amino acid transporter 1      | Slc7a1   | 0 | 7 |
| Insulin receptor                                   | Insr     | 0 | 8 | Liprin-alpha-3                                       | Ppfia3   | 0 | 7 |
| Lipid phosphate phosphatase-related protein type 3 | Lppr3    | 0 | 8 | Low-density lipoprotein receptor-related protein 4   | Lrp4     | 0 | 7 |
| Nidogen-1                                          | Nid1     | 0 | 8 | Neurexin-1-alpha                                     | Nrxn1    | 0 | 7 |
| SLIT and NTRK-like protein 2                       | Slitrk2  | 0 | 8 | Neuropilin-1                                         | Nrp1     | 0 | 7 |
| SLIT and NTRK-like protein 4                       | Slitrk4  | 0 | 8 | Repulsive guidance molecule A                        | Rgma     | 0 | 7 |
| Tenascin-R                                         | Tnr      | 0 | 8 | Roundabout homolog 1                                 | Robo1    | 0 | 7 |
| Very low-density lipoprotein receptor              | Vldlr    | 0 | 8 | Sodium-coupled neutral amino acid transporter 1      | Slc38a1  | 0 | 7 |
| Alpha-mannosidase 2C1                              | Man2c1   | 1 | 7 | Solute carrier family 12 member 9                    | Slc12a9  | 0 | 7 |
| Sphingomyelin phosphodiesterase 2                  | Smpd2    | 1 | 7 | Transmembrane protein 132A                           | Tmem132a | 0 | 7 |
| Basic fibroblast growth factor receptor 1          | Fgfr1    | 0 | 7 | V-type proton ATPase 116 kDa subunit a isoform 2     | Atp6v0a2 | 0 | 7 |
| Beta-1,4-galactosyltransferase 5                   | B4galt5  | 0 | 7 | Zinc transporter SLC39A7                             | Slc39a7  | 0 | 7 |
| Dystroglycan                                       | Dag1     | 0 | 7 | ATP-binding cassette sub-family D member 3           | Abcd3    | 1 | 6 |
| GDNF family receptor alpha-2                       | Gfra2    | 0 | 7 | Beta-hexosaminidase subunit beta                     | Hexb     | 1 | 6 |
| Glutamate receptor 2                               | Gria2    | 0 | 7 | Discoidin, CUB and LCCL domain-containing protein 2  | Dcbld2   | 0 | 6 |
| Glypican-6                                         | Gpc6     | 0 | 7 | Dolichyl-phosphate beta-glucosyltransferase          | Alg5     | 0 | 6 |
| Poliovirus receptor-related protein 1              | Pvrl1    | 0 | 7 | Glycoprotein endo-alpha-1,2-mannosidase-like protein | Maneal   | 0 | 6 |
| Prostaglandin F2 receptor negative regulator       | Ptgfrn   | 0 | 7 | Kelch repeat and BTB domain-containing protein 4     | Kbtbd4   | 0 | 6 |
| Protocadherin Fat 4                                | Fat4     | 0 | 7 | Leukocyte surface antigen CD47                       | Cd47     | 0 | 6 |
| SLIT and NTRK-like protein 1                       | Slitrk1  | 0 | 7 | Limbic system-associated membrane protein            | Lsamp    | 0 | 6 |
| Transmembrane protein 132E                         | Tmem132e | 0 | 7 | Major prion protein                                  | Prnp     | 0 | 6 |
| Transmembrane protein 9                            | Tmem9    | 0 | 7 | Tenascin-R                                           | Tnr      | 0 | 6 |
| UPF0552 protein C15orf38 homolog                   |          | 0 | 7 | Thyroid adenoma-associated protein homolog           | Thada    | 0 | 6 |
| Tetraspanin-31                                     | Tspan31  | 1 | 6 | Uncharacterized protein KIAA1211                     | Kiaa1211 | 0 | 6 |

|                                                                         |          |   |   |                                                                                        |          |     |     |
|-------------------------------------------------------------------------|----------|---|---|----------------------------------------------------------------------------------------|----------|-----|-----|
| C-type mannose receptor 2                                               | Mrc2     | 0 | 6 | Voltage-dependent calcium channel subunit alpha-2/delta-2                              | Cacna2d2 | 0   | 6   |
| Dolichyl-phosphate beta-glucosyltransferase                             | Alg5     | 0 | 6 | Amyloid-like protein 1                                                                 | Aplp1    | 0   | 5   |
| IgLON family member 5                                                   | Iglon5   | 0 | 6 | BEN domain-containing protein 3                                                        | Bend3    | 0   | 5   |
| Keratinocyte-associated transmembrane protein 2                         | Kct2     | 0 | 6 | BolA-like protein 1                                                                    | Bola1    | 0   | 5   |
| Leukocyte surface antigen CD47                                          | Cd47     | 0 | 6 | Cadherin EGF LAG seven-pass G-type receptor 2                                          | Celsr2   | 0   | 5   |
| Orphan sodium- and chloride-dependent neurotransmitter transporter NTT4 | Slc6a17  | 0 | 6 | Contactin-4                                                                            | Cntn4    | 0   | 5   |
| Phospholipase D3                                                        | Pld3     | 0 | 6 | Extracellular leucine-rich repeat and fibronectin type-III domain-containing protein 1 | Elfn1    | 0   | 5   |
| Protein dispatched homolog 2                                            | Disp2    | 0 | 6 | Fibulin-2                                                                              | Fbln2    | 0   | 5   |
| Protein FAM20B                                                          | Fam20b   | 0 | 6 | Frizzled-7                                                                             | Fzd7     | 0   | 5   |
| Protein ITFG3                                                           | Itfg3    | 0 | 6 | GDNF family receptor alpha-2                                                           | Gfra2    | 0   | 5   |
| Sodium-coupled neutral amino acid transporter 1                         | Slc38a1  | 0 | 6 | Glutamate receptor, ionotropic kainate 2                                               | Grik2    | 0   | 5   |
| Solute carrier family 22 member 23                                      | Slc22a23 | 0 | 6 | Golgi membrane protein 1                                                               | Golm1    | 0   | 5   |
| Sortilin                                                                | Sort1    | 0 | 6 | Leucine-rich repeat-containing protein 40                                              | Lrrc40   | 0   | 5   |
| Uncharacterized protein KIAA1467                                        | Kiaa1467 | 0 | 6 | Monoacylglycerol lipase ABHD12                                                         | Abhd12   | 0   | 5   |
| Vezatin                                                                 | Vezt     | 0 | 6 | Protein tweety homolog 3                                                               | Ttyh3    | 0   | 5   |
| Voltage-dependent calcium channel subunit alpha-2/delta-2               | Cacna2d2 | 0 | 6 | Pumilio domain-containing protein C14orf21 homolog                                     |          | 0   | 5   |
| Protein tyrosine phosphatase-like protein PTPLAD1                       | Ptplad1  | 1 | 5 | Receptor-type tyrosine-protein phosphatase gamma                                       | Ptprg    | 0   | 5   |
| SLIT-ROBO Rho GTPase-activating protein 3                               | Srgap3   | 1 | 5 | Reelin                                                                                 | Reln     | 0   | 5   |
| Calsyntenin-1                                                           | Clstn1   | 0 | 5 | SLIT and NTRK-like protein 2                                                           | Slitrk2  | 0   | 5   |
| Crumbs homolog 2                                                        | Crb2     | 0 | 5 | Syndecan-3                                                                             | Sdc3     | 0   | 5   |
| Disks large-associated protein 4                                        | Dlgap4   | 0 | 5 | Transmembrane emp24 domain-containing protein 1                                        | Tmed1    | 0   | 5   |
| Galactosylgalactosylxylosylprotein 3-beta-glucuronosyltransferase 3     | B3gat3   | 0 | 5 | Transmembrane protein 9                                                                | Tmem9    | 0   | 5   |
| Galectin-1                                                              | Lgals1   | 0 | 5 | Glyceraldehyde-3-phosphate dehydrogenase                                               | Gapdh    | 110 | 737 |
| GDNF family receptor alpha-1                                            | Gfra1    | 0 | 5 | Tubulin beta-4 chain                                                                   | Tubb4    | 0   | 358 |
| Glutamate receptor 1                                                    | Gria1    | 0 | 5 | Tubulin alpha-1C chain                                                                 | Tuba1c   | 0   | 205 |
| H(+)/Cl(-) exchange transporter 3                                       | Clcn3    | 0 | 5 | Alpha-internexin                                                                       | Ina      | 29  | 145 |

|                                                      |         |    |     |                                                      |         |    |     |
|------------------------------------------------------|---------|----|-----|------------------------------------------------------|---------|----|-----|
| Heparan sulfate 2-O-sulfotransferase 1               | Hs2st1  | 0  | 5   | T-complex protein 1 subunit beta                     | Cct2    | 16 | 128 |
| Integrin beta-5                                      | Itgb5   | 0  | 5   | Voltage-dependent anion-selective channel protein 3  | Vdac3   | 11 | 115 |
| Leucine-rich repeat-containing protein 8C            | Lrrc8c  | 0  | 5   | Actin, alpha cardiac muscle 1                        | Actc1   | 0  | 113 |
| Potassium-transporting ATPase alpha chain 1          | Atp4a   | 0  | 5   | Protein arginine N-methyltransferase 1               | Prmt1   | 13 | 110 |
| Seizure 6-like protein                               | Sez6l   | 0  | 5   | Adenylyl cyclase-associated protein 1                | Cap1    | 8  | 100 |
| Sodium-coupled neutral amino acid transporter 2      | Slc38a2 | 0  | 5   | Drebrin                                              | Dbn1    | 14 | 74  |
| Vascular cell adhesion protein 1                     | Vcam1   | 0  | 5   | Lamina-associated polypeptide 2, isoforms alpha/zeta | Tmpo    | 5  | 71  |
| Vesicular integral-membrane protein VIP36            | Lman2   | 0  | 5   | Heterogeneous nuclear ribonucleoprotein A3           | Hnrnpa3 | 5  | 63  |
| Voltage-dependent calcium channel gamma-8 subunit    | Cacng8  | 0  | 5   | Nucleolar protein 58                                 | Nop58   | 2  | 61  |
| Voltage-dependent anion-selective channel protein 3  | Vdac3   | 15 | 122 | Beta-actin-like protein 2                            | Actbl2  | 0  | 61  |
| Alpha-internexin                                     | Ina     | 11 | 86  | Ras-related protein Rab-14                           | Rab14   | 8  | 55  |
| T-complex protein 1 subunit beta                     | Cct2    | 10 | 73  | Inositol monophosphatase 1                           | Impa1   | 9  | 51  |
| Lamina-associated polypeptide 2, isoforms alpha/zeta | Tmpo    | 4  | 57  | Heterogeneous nuclear ribonucleoprotein F            | Hnrnpf  | 7  | 50  |
| Prolyl endopeptidase                                 | Prep    | 4  | 53  | Tumor suppressor p53-binding protein 1               | Tp53bp1 | 2  | 46  |
| Histone H2A.J                                        | H2afj   | 0  | 44  | L-asparaginase                                       | Asrgl1  | 8  | 46  |
| Thymidylate synthase                                 | Tyms    | 0  | 41  | Mitochondrial carrier homolog 2                      | Mtch2   | 2  | 44  |
| Adenylyl cyclase-associated protein 1                | Cap1    | 4  | 39  | Exportin-5                                           | Xpo5    | 8  | 42  |
| S-methyl-5~-thioadenosine phosphorylase              | Mtap    | 4  | 36  | Cytoplasmic FMR1-interacting protein 2               | Cyfip2  | 2  | 41  |
| Nucleolar protein 58                                 | Nop58   | 5  | 36  | Triple functional domain protein                     | Trio    | 1  | 40  |
| Proline-, glutamic acid- and leucine-rich protein 1  | Pelp1   | 3  | 35  | Nuclear pore complex protein Nup155                  | Nup155  | 3  | 40  |
| Lethal(2) giant larvae protein homolog 1             | Llgl1   | 6  | 35  | Phosphoacetylglucosamine mutase                      | Pgm3    | 5  | 40  |
| F-actin-capping protein subunit beta                 | Capzb   | 4  | 32  | Crk-like protein                                     | Crkl    | 0  | 39  |
| Mitochondrial carrier homolog 2                      | Mtch2   | 6  | 31  | S-methyl-5~-thioadenosine phosphorylase              | Mtap    | 1  | 37  |
| Beta-actin-like protein 2                            | Actbl2  | 0  | 28  | E3 ubiquitin-protein ligase HUWE1                    | Huwe1   | 6  | 37  |
| E3 ubiquitin-protein ligase HUWE1                    | Huwe1   | 3  | 27  | CLIP-associating protein 1                           | Clasp1  | 5  | 34  |
| Glycogen phosphorylase, brain form                   | Pygb    | 4  | 27  | Lethal(2) giant larvae protein homolog 1             | Llgl1   | 5  | 34  |
| Serine/threonine-protein kinase DCLK2                | Dclk2   | 2  | 26  | Glutathione S-transferase Mu 5                       | Gstm5   | 3  | 33  |



|                                                                             |           |   |    |                                                                                  |          |   |    |
|-----------------------------------------------------------------------------|-----------|---|----|----------------------------------------------------------------------------------|----------|---|----|
| Crk-like protein                                                            | Crkl      | 0 | 26 | Phosphoribosylformylglycinamide synthase                                         | Pfas     | 6 | 33 |
| Tumor suppressor p53-binding protein 1                                      | Tp53bp1   | 1 | 25 | Acyl-coenzyme A thioesterase 1                                                   | Acot1    | 4 | 32 |
| Dynamin-1-like protein                                                      | Dnm1l     | 2 | 24 | Glutathione reductase, mitochondrial                                             | Gsr      | 4 | 32 |
| Centrosomal protein of 170 kDa                                              | Cep170    | 4 | 24 | Vesicle-associated membrane protein-associated protein A                         | Vapa     | 6 | 32 |
| Keratin, type II cuticular Hb6                                              | Krt86     | 0 | 24 | Bifunctional protein NCOAT                                                       | Mgea5    | 4 | 31 |
| Serine/threonine-protein phosphatase PP1-alpha catalytic subunit            | Ppp1ca    | 3 | 22 | Heterogeneous nuclear ribonucleoprotein L-like                                   | Hnrpll   | 4 | 31 |
| 26S proteasome non-ATPase regulatory subunit 13                             | Psmd13    | 4 | 22 | Proline-, glutamic acid- and leucine-rich protein 1                              | Pelp1    | 4 | 30 |
| Histone H2B type 3-A                                                        | Hist3h2ba | 0 | 22 | Structural maintenance of chromosomes flexible hinge domain-containing protein 1 | Smchd1   | 6 | 30 |
| Keratin, type I cuticular Ha1                                               | Krt31     | 0 | 22 | Thymidylate synthase                                                             | Tyms     | 0 | 30 |
| Ran-binding protein 3                                                       | Ranbp3    | 1 | 21 | DNA-(apurinic or apyrimidinic site) lyase                                        | Apex1    | 3 | 29 |
| Enhancer of mRNA-decapping protein 4                                        | Edc4      | 4 | 21 | GMP synthase [glutamine-hydrolyzing]                                             | Gmps     | 5 | 29 |
| Protein RUFY3                                                               | Rufy3     | 4 | 21 | Interferon-inducible double stranded RNA-dependent protein kinase activator A    | Prkra    | 5 | 29 |
| Methylosome protein 50                                                      | Wdr77     | 2 | 20 | Dedicator of cytokinesis protein 7                                               | Dock7    | 0 | 29 |
| CLIP-associating protein 1                                                  | Clasp1    | 1 | 19 | Probable global transcription activator SNF2L1                                   | Smarca1  | 0 | 29 |
| Membrane-associated progesterone receptor component 1                       | Pgrmc1    | 2 | 19 | Methylosome protein 50                                                           | Wdr77    | 1 | 27 |
| Keratin, type II cuticular Hb1 (Fragment)                                   | Krt81     | 0 | 19 | Destrin                                                                          | Dstn     | 3 | 26 |
| Cytoplasmic FMR1-interacting protein 2                                      | Cyfip2    | 1 | 18 | Vesicle-associated membrane protein-associated protein B                         | Vapb     | 0 | 26 |
| KH domain-containing, RNA-binding, signal transduction-associated protein 1 | Khdrbs1   | 2 | 18 | Ubiquitin carboxyl-terminal hydrolase 7                                          | Usp7     | 1 | 25 |
| Zinc finger protein 326                                                     | Znf326    | 2 | 18 | Putative oxidoreductase GLYR1                                                    | Glyr1    | 4 | 25 |
| Trifunctional purine biosynthetic protein adenosine-3                       | Gart      | 3 | 17 | Kinesin-like protein KIF21A                                                      | Kif21a   | 3 | 24 |
| Keratin, type II cuticular Hb3                                              | Krt83     | 0 | 17 | Trifunctional purine biosynthetic protein adenosine-3                            | Gart     | 0 | 24 |
| Keratin, type II cuticular Hb5                                              | Krt85     | 0 | 17 | Actin-related protein 2/3 complex subunit 1A                                     | Arpc1a   | 1 | 23 |
| Fragile X mental retardation syndrome-related protein 1                     | Fxr1      | 0 | 16 | Rho guanine nucleotide exchange factor 12                                        | Arhgef12 | 2 | 23 |
| CDKN2A-interacting protein                                                  | Cdkn2aip  | 1 | 15 | Zinc finger protein 326                                                          | Znf326   | 3 | 23 |



|                                                             |          |   |    |                                                                             |         |   |    |
|-------------------------------------------------------------|----------|---|----|-----------------------------------------------------------------------------|---------|---|----|
| Cytoplasmic dynein 1 light intermediate chain 1             | Dync1li1 | 3 | 15 | Zinc finger protein 638                                                     | Znf638  | 3 | 23 |
| 40S ribosomal protein S10                                   | Rps10    | 1 | 14 | Calretinin                                                                  | Calb2   | 0 | 23 |
| Opioid growth factor receptor                               | Ogfr     | 1 | 14 | Keratin, type II cytoskeletal 75                                            | Krt75   | 0 | 23 |
| Peroxiredoxin-5, mitochondrial                              | Prdx5    | 1 | 14 | Inorganic pyrophosphatase                                                   | Ppa1    | 1 | 22 |
| SUMO-activating enzyme subunit 2                            | Uba2     | 2 | 14 | 3~(2~),5~-bisphosphate nucleotidase 1                                       | Bpnt1   | 2 | 22 |
| BAG family molecular chaperone regulator 5                  | Bag5     | 0 | 14 | Ubiquitin thioesterase OTUB1                                                | Otub1   | 3 | 22 |
| Protein phosphatase 1E                                      | Ppm1e    | 0 | 14 | Scaffold attachment factor B2                                               | Safb2   | 4 | 22 |
| Serine/threonine-protein phosphatase 4 regulatory subunit 1 | Ppp4r1   | 0 | 14 | CLIP-associating protein 2                                                  | Clasp2  | 2 | 21 |
| Zinc finger protein 512                                     | Znf512   | 0 | 14 | Protein MON2 homolog                                                        | Mon2    | 2 | 21 |
| Diacylglycerol kinase epsilon                               | Dgke     | 1 | 13 | KH domain-containing, RNA-binding, signal transduction-associated protein 1 | Khdrbs1 | 3 | 21 |
| Proteasome assembly chaperone 1                             | Psmg1    | 1 | 13 | Importin-7                                                                  | Ipo7    | 4 | 21 |
| Protein NDRG2                                               | Ndrp2    | 1 | 13 | Kinesin-like protein KIF21B                                                 | Kif21b  | 4 | 21 |
| Neurobeachin                                                | Nbea     | 2 | 13 | Microtubule-associated protein 1A                                           | Map1a   | 0 | 21 |
| Superkiller viralicidic activity 2-like 2                   | Skiv2l2  | 2 | 13 | Kinesin light chain 1                                                       | Klc1    | 2 | 20 |
| Keratin, type I cytoskeletal 15                             | Krt15    | 0 | 13 | Serine/threonine-protein phosphatase PP1-beta catalytic subunit             | Ppp1cb  | 2 | 20 |
| Kinesin heavy chain isoform 5A                              | Kif5a    | 0 | 13 | Tyrosine-protein kinase BAZ1B                                               | Baz1b   | 3 | 20 |
| 60 kDa SS-A/Ro ribonucleoprotein                            | Trove2   | 1 | 12 | NMDA receptor-regulated protein 1                                           | Narg1   | 4 | 20 |
| Nucleobindin-1                                              | Nucb1    | 1 | 12 | Aladin                                                                      | Aaas    | 0 | 20 |
| Scaffold attachment factor B2                               | Safb2    | 1 | 12 | Sister chromatid cohesion protein PDS5 homolog A                            | Pds5a   | 3 | 19 |
| Adenylosuccinate lyase                                      | Adsl     | 2 | 12 | Nuclear receptor coactivator 5                                              | Ncoa5   | 0 | 19 |
| Prostaglandin E synthase 3                                  | Ptges3   | 2 | 12 | Nucleoporin NUP188 homolog                                                  | Nup188  | 1 | 18 |
| 60S ribosomal protein L35                                   | Rpl35    | 0 | 12 | General transcription factor 3C polypeptide 1                               | Gtf3c1  | 2 | 18 |
| Calretinin                                                  | Calb2    | 0 | 12 | Thioredoxin-like protein 1                                                  | Txnl1   | 2 | 18 |
| DNA (cytosine-5)-methyltransferase 3A                       | Dnmt3a   | 0 | 12 | Glycogen phosphorylase, brain form                                          | Pygb    | 3 | 18 |
| Keratin, type I cuticular Ha5                               | Krt35    | 0 | 12 | 2~,5~-phosphodiesterase 12                                                  | Pde12   | 0 | 18 |
| Hydroxyacyl-coenzyme A dehydrogenase, mitochondrial         | Hadh     | 1 | 11 | Histone-arginine methyltransferase CARM1                                    | Carm1   | 0 | 18 |
| Phosphoribosyl pyrophosphate synthase-associated protein 1  | Prpsap1  | 1 | 11 | MMS19 nucleotide excision repair protein homolog                            | Mms19   | 1 | 17 |

|                                                                                               |          |   |    |                                                  |        |   |    |
|-----------------------------------------------------------------------------------------------|----------|---|----|--------------------------------------------------|--------|---|----|
| Ubiquitin carboxyl-terminal hydrolase 10                                                      | Usp10    | 2 | 11 | Prostaglandin E synthase 3                       | Ptges3 | 1 | 17 |
| Microsomal glutathione S-transferase 3                                                        | Mgst3    | 0 | 11 | Tropomyosin alpha-3 chain                        | Tpm3   | 1 | 17 |
| Plasminogen activator inhibitor 1 RNA-binding protein                                         | Serbp1   | 0 | 11 | Nucleophosmin                                    | Npm1   | 2 | 17 |
| ARF GTPase-activating protein GIT1                                                            | Git1     | 1 | 10 | 40S ribosomal protein S12                        | Rps12  | 3 | 17 |
| cAMP-dependent protein kinase catalytic subunit beta                                          | Prkacb   | 1 | 10 | Anaphase-promoting complex subunit 1             | Anapc1 | 3 | 17 |
| Splicing factor, arginine/serine-rich 13A                                                     | Sfrs13a  | 1 | 10 | Huntingtin                                       | Htt    | 0 | 17 |
| C-Jun-amino-terminal kinase-interacting protein 3                                             | Mapk8ip3 | 2 | 10 | Protein FAM98B                                   | Fam98b | 0 | 17 |
| Cytoplasmic tRNA 2-thiolation protein 2                                                       | Ctu2     | 2 | 10 | Death-inducer obliterator 1                      | Dido1  | 2 | 16 |
| Neurochondrin                                                                                 | Ncdn     | 2 | 10 | 5~-3~ exoribonuclease 2                          | Xrn2   | 3 | 16 |
| S-formylglutathione hydrolase                                                                 | Esd      | 2 | 10 | Ubiquitin-conjugating enzyme E2 variant 2        | Ube2v2 | 3 | 16 |
| 2~,5~-phosphodiesterase 12                                                                    | Pde12    | 0 | 10 | Importin-9                                       | Ipo9   | 0 | 16 |
| 3~(2~),5~-bisphosphate nucleotidase 1                                                         | Bpnt1    | 0 | 10 | Nucleoside diphosphate kinase B                  | Nme2   | 0 | 16 |
| Hepatoma-derived growth factor                                                                | Hdgf     | 0 | 10 | Tyrosine-protein kinase CSK                      | Csk    | 0 | 16 |
| Interferon-inducible double stranded RNA-dependent protein kinase activator A                 | Prkra    | 0 | 10 | Ubiquitin carboxyl-terminal hydrolase 24         | Usp24  | 0 | 16 |
| Keratin, type I cuticular Ha4                                                                 | Krt34    | 0 | 10 | Hemoglobin subunit zeta                          | Hbz    | 1 | 15 |
| Kinesin light chain 4                                                                         | Klc4     | 0 | 10 | 60 kDa SS-A/Ro ribonucleoprotein                 | Trove2 | 2 | 15 |
| Tubulin-specific chaperone D                                                                  | Tbcd     | 0 | 10 | Ubiquitin carboxyl-terminal hydrolase 4          | Usp4   | 3 | 15 |
| 60S ribosomal protein L32                                                                     | Rpl32    | 1 | 9  | BAG family molecular chaperone regulator 5       | Bag5   | 0 | 15 |
| Cytosolic acyl coenzyme A thioester hydrolase                                                 | Acot7    | 1 | 9  | Kinesin light chain 4                            | Klc4   | 0 | 15 |
| Replication factor C subunit 4                                                                | Rfc4     | 1 | 9  | Neurofibromin                                    | Nf1    | 0 | 15 |
| Zinc finger CCCH domain-containing protein 11A                                                | Zc3h11a  | 1 | 9  | RAC-alpha serine/threonine-protein kinase        | Akt1   | 0 | 15 |
| A-kinase anchor protein 8                                                                     | Akap8    | 0 | 9  | Sterile alpha and TIR motif-containing protein 1 | Sarm1  | 0 | 15 |
| Cofilin-2                                                                                     | Cfl2     | 0 | 9  | 60S ribosomal protein L7                         | Rpl7   | 1 | 14 |
| Pyrroline-5-carboxylate reductase 3                                                           | Pycrl    | 0 | 9  | Sentrin-specific protease 7                      | Senp7  | 1 | 14 |
| Rho-related GTP-binding protein RhoC                                                          | Rhoc     | 0 | 9  | Synaptojanin-1                                   | Synj1  | 1 | 14 |
| Septin-8                                                                                      | Sept8    | 0 | 9  | N-acetylneuraminase cytidyltransferase           | Cmas   | 2 | 14 |
| SWI/SNF-related matrix-associated actin-dependent regulator of chromatin subfamily D member 3 | Smardc3  | 0 | 9  | NEDD8 ultimate buster 1                          | Nub1   | 2 | 14 |

|                                                          |         |   |   |                                                                                               |         |   |    |
|----------------------------------------------------------|---------|---|---|-----------------------------------------------------------------------------------------------|---------|---|----|
| 2-amino-3-ketobutyrate coenzyme A ligase, mitochondrial  | Gcat    | 1 | 8 | Phosphomevalonate kinase                                                                      | Pmvk    | 2 | 14 |
| Cell division control protein 2 homolog                  | Cdc2    | 1 | 8 | Tubulin-specific chaperone D                                                                  | Tbcd    | 2 | 14 |
| Choline-phosphate cytidyltransferase A                   | Pcyt1a  | 1 | 8 | Keratin, type I cytoskeletal 13                                                               | Krt13   | 0 | 14 |
| Ubiquitin carboxyl-terminal hydrolase 24                 | Usp24   | 1 | 8 | LanC-like protein 2                                                                           | Lancl2  | 0 | 14 |
| Actin-related protein 2/3 complex subunit 5-like protein | Arpc5l  | 0 | 8 | Proteasome assembly chaperone 1                                                               | Psmg1   | 0 | 14 |
| E3 ubiquitin-protein ligase MARCH5                       | March5  | 0 | 8 | SWI/SNF-related matrix-associated actin-dependent regulator of chromatin subfamily D member 3 | Smardc3 | 0 | 14 |
| Phosphoacetylglucosamine mutase                          | Pgm3    | 0 | 8 | Xaa-Pro aminopeptidase 1                                                                      | Xpnpep1 | 1 | 13 |
| SH3 domain-binding glutamic acid-rich-like protein       | Sh3bgrl | 0 | 8 | Zinc finger protein 512                                                                       | Znf512  | 1 | 13 |
| Sorting nexin-27                                         | Snx27   | 0 | 8 | 60S ribosomal protein L21                                                                     | Rpl21   | 2 | 13 |
| 40S ribosomal protein S24                                | Rps24   | 1 | 7 | Eukaryotic translation initiation factor 4B                                                   | Eif4b   | 2 | 13 |
| Adenylosuccinate synthetase isozyme 2                    | Adss    | 1 | 7 | Cell division protein kinase 5                                                                | Cdk5    | 0 | 13 |
| Phosphatidylinositol-5-phosphate 4-kinase type-2 beta    | Pip4k2b | 1 | 7 | NEDD8-activating enzyme E1 catalytic subunit                                                  | Uba3    | 0 | 13 |
| RNA 3'-terminal phosphate cyclase                        | Rtcd1   | 1 | 7 | Serine/threonine-protein kinase VRK1                                                          | Vrk1    | 0 | 13 |
| Sentrin-specific protease 7                              | Senp7   | 1 | 7 | tRNA-dihydrouridine synthase 3-like                                                           | Dus3l   | 0 | 13 |
| Sideroflexin-3                                           | Sfxn3   | 1 | 7 | Ubiquitin carboxyl-terminal hydrolase 10                                                      | Usp10   | 0 | 13 |
| Triple functional domain protein                         | Trio    | 1 | 7 | A-kinase anchor protein 8                                                                     | Akap8   | 1 | 12 |
| Tyrosyl-DNA phosphodiesterase 1                          | Tdp1    | 1 | 7 | DmX-like protein 2                                                                            | Dmxl2   | 1 | 12 |
| Zinc finger protein 638                                  | Znf638  | 1 | 7 | Proteasome activator complex subunit 2                                                        | Psme2   | 1 | 12 |
| ADP-ribosylation factor 1                                | Arf1    | 0 | 7 | Zinc finger ZZ-type and EF-hand domain-containing protein 1                                   | Zzef1   | 1 | 12 |
| Cell division protein kinase 5                           | Cdk5    | 0 | 7 | Copine-1                                                                                      | Cpne1   | 2 | 12 |
| Coiled-coil domain-containing protein 22                 | Ccdc22  | 0 | 7 | Ubiquitin-conjugating enzyme E2 O                                                             | Ube2o   | 2 | 12 |
| General transcription factor 3C polypeptide 1            | Gtf3c1  | 0 | 7 | A-kinase anchor protein 12                                                                    | Akap12  | 0 | 12 |
| Keratin, type I cytoskeletal 13                          | Krt13   | 0 | 7 | Alpha-centractin                                                                              | Actr1a  | 0 | 12 |
| Kinesin light chain 2                                    | Klc2    | 0 | 7 | Eukaryotic initiation factor 4A-II                                                            | Eif4a2  | 0 | 12 |
| Lysophosphatidylcholine acyltransferase 1                | Lpcat1  | 0 | 7 | Sorting nexin-27                                                                              | Snx27   | 0 | 12 |
| Microtubule-associated protein 1A                        | Map1a   | 0 | 7 | Tyrosine-protein phosphatase non-receptor type 1                                              | Ptpn1   | 0 | 12 |

|                                                                              |          |   |   |                                                                            |         |   |    |
|------------------------------------------------------------------------------|----------|---|---|----------------------------------------------------------------------------|---------|---|----|
| Mitogen-activated protein kinase 10                                          | Mapk10   | 0 | 7 | Phospholipid hydroperoxide glutathione peroxidase, mitochondrial           | Gpx4    | 1 | 11 |
| Mitogen-activated protein kinase 8                                           | Mapk8    | 0 | 7 | WD repeat-containing protein 47                                            | Wdr47   | 1 | 11 |
| MMS19 nucleotide excision repair protein homolog                             | Mms19    | 0 | 7 | Cytoplasmic tRNA 2-thiolation protein 2                                    | Ctu2    | 2 | 11 |
| Nuclear receptor coactivator 5                                               | Ncoa5    | 0 | 7 | Phosphatidylinositol 3,4,5-trisphosphate-dependent Rac exchanger 1 protein | Prex1   | 2 | 11 |
| Programmed cell death 6-interacting protein                                  | Pdcd6ip  | 0 | 7 | Proteasome activator complex subunit 1                                     | Psme1   | 2 | 11 |
| Succinate dehydrogenase cytochrome b560 subunit, mitochondrial               | Sdhc     | 0 | 7 | Proteasome activator complex subunit 4                                     | Psme4   | 2 | 11 |
| TBC1 domain family member 13                                                 | Tbc1d13  | 0 | 7 | Serine/threonine-protein phosphatase 5                                     | Ppp5c   | 2 | 11 |
| Tetratricopeptide repeat protein 5                                           | Ttc5     | 0 | 7 | Splicing factor, arginine/serine-rich 13A                                  | Sfrs13a | 2 | 11 |
| Torsin-1A-interacting protein 1                                              | Tor1aip1 | 0 | 7 | THO complex subunit 2                                                      | Thoc2   | 2 | 11 |
| Transcriptional activator protein Pur-alpha                                  | Pura     | 0 | 7 | A.T hook DNA-binding motif-containing protein 1                            | Ahdc1   | 0 | 11 |
| Transcriptional regulator ATRX                                               | Atrx     | 0 | 7 | Adenylosuccinate synthetase isozyme 2                                      | Adss    | 0 | 11 |
| Tyrosine-protein kinase CSK                                                  | Csk      | 0 | 7 | Basic leucine zipper and W2 domain-containing protein 1                    | Bzw1    | 0 | 11 |
| 6-phosphofructokinase, liver type                                            | Pfkl     | 1 | 6 | COP9 signalosome complex subunit 7b                                        | Cops7b  | 0 | 11 |
| Calpain-2 catalytic subunit                                                  | Capn2    | 1 | 6 | Keratin, type I cytoskeletal 15                                            | Krt15   | 0 | 11 |
| CTP synthase 1                                                               | Ctps     | 1 | 6 | Nucleobindin-1                                                             | Nucb1   | 0 | 11 |
| Cytochrome c oxidase subunit 4 isoform 1, mitochondrial                      | Cox4i1   | 1 | 6 | NudC domain-containing protein 1                                           | Nudcd1  | 0 | 11 |
| NADH dehydrogenase [ubiquinone] 1 alpha subcomplex subunit 10, mitochondrial | Ndufa10  | 1 | 6 | Programmed cell death 6-interacting protein                                | Pdcd6ip | 0 | 11 |
| Phospholipid hydroperoxide glutathione peroxidase, mitochondrial             | Gpx4     | 1 | 6 | Protein ELYS                                                               | Ahctf1  | 0 | 11 |
| Pogo transposable element with ZNF domain                                    | Pogz     | 1 | 6 | Protein LAS1 homolog                                                       | Las1l   | 0 | 11 |
| Protein FAM49B                                                               | Fam49b   | 1 | 6 | Putative splicing factor, arginine/serine-rich 14                          | Sfrs14  | 0 | 11 |
| Serine/threonine-protein phosphatase 4 regulatory subunit 2                  | Ppp4r2   | 1 | 6 | Ras-related protein Rab-10                                                 | Rab10   | 0 | 11 |
| 39S ribosomal protein L15, mitochondrial                                     | Mrpl15   | 0 | 6 | Spastin                                                                    | Spast   | 0 | 11 |
| Cold shock domain-containing protein E1                                      | Csde1    | 0 | 6 | Asparagine synthetase [glutamine-hydrolyzing]                              | Asns    | 1 | 10 |
| Cold-inducible RNA-binding protein                                           | Cirbp    | 0 | 6 | Cullin-associated NEDD8-dissociated protein 2                              | Cand2   | 1 | 10 |

|                                                                          |          |   |   |                                                                    |         |   |    |
|--------------------------------------------------------------------------|----------|---|---|--------------------------------------------------------------------|---------|---|----|
| E3 ubiquitin-protein ligase TTC3                                         | Ttc3     | 0 | 6 | Kelch-like ECH-associated protein 1                                | Keap1   | 1 | 10 |
| Exportin-7                                                               | Xpo7     | 0 | 6 | Phosphoribosyl pyrophosphate synthase-associated protein 1         | Prpsap1 | 1 | 10 |
| Fermitin family homolog 2                                                | Fermt2   | 0 | 6 | Drebrin-like protein                                               | Dbnl    | 2 | 10 |
| Glycylpeptide N-tetradecanoyltransferase 2                               | Nmt2     | 0 | 6 | Kinesin-like protein KIF1A                                         | Kif1a   | 2 | 10 |
| Hemoglobin subunit beta-1                                                | Hbb-b1   | 0 | 6 | Large proline-rich protein BAT3                                    | Bat3    | 2 | 10 |
| Keratin, type II cuticular Hb2                                           | Krt82    | 0 | 6 | Serine-threonine kinase receptor-associated protein                | Strap   | 2 | 10 |
| Kinetochores-associated protein 1                                        | Kntc1    | 0 | 6 | ADP-ribosylation factor 1                                          | Arf1    | 0 | 10 |
| Myotubularin-related protein 5                                           | Sbf1     | 0 | 6 | Centrosomal protein of 97 kDa                                      | Cep97   | 0 | 10 |
| NEDD8-activating enzyme E1 catalytic subunit                             | Uba3     | 0 | 6 | Diacylglycerol kinase epsilon                                      | Dgke    | 0 | 10 |
| NudC domain-containing protein 1                                         | Nudcd1   | 0 | 6 | E3 ubiquitin-protein ligase BRE1B                                  | Rnf40   | 0 | 10 |
| Phosphoprotein associated with glycosphingolipid-enriched microdomains 1 | Pag1     | 0 | 6 | Fragile X mental retardation syndrome-related protein 1            | Fxr1    | 0 | 10 |
| Phosphorylated adapter RNA export protein                                | Phax     | 0 | 6 | Histone deacetylase 2                                              | Hdac2   | 0 | 10 |
| Proteasome activator complex subunit 2                                   | Psme2    | 0 | 6 | Nuclear pore complex protein Nup214                                | Nup214  | 0 | 10 |
| Ras-related protein Rab-6A                                               | Rab6a    | 0 | 6 | Proteasome assembly chaperone 2                                    | Psmg2   | 0 | 10 |
| Signal peptidase complex catalytic subunit SEC11A                        | Sec11a   | 0 | 6 | Protein FAM49B                                                     | Fam49b  | 0 | 10 |
| Treacle protein                                                          | Tcof1    | 0 | 6 | Ras-related C3 botulinum toxin substrate 3                         | Rac3    | 0 | 10 |
| Tyrosine-protein phosphatase non-receptor type 11                        | Ptpn11   | 0 | 6 | Ras-related protein Rap-1A                                         | Rap1a   | 0 | 10 |
| UMP-CMP kinase 2, mitochondrial                                          | Cmpk2    | 0 | 6 | TBC1 domain family member 13                                       | Tbc1d13 | 0 | 10 |
| Uncharacterized protein C19orf43 homolog                                 |          | 0 | 6 | Transcriptional activator protein Pur-alpha                        | Pura    | 0 | 10 |
| WD repeat domain phosphoinositide-interacting protein 3                  | Wdr45l   | 0 | 6 | Translation initiation factor eIF-2B subunit delta                 | Eif2b4  | 0 | 10 |
| 3-hydroxyacyl-CoA dehydrogenase type-2                                   | Hsd17b10 | 1 | 5 | Vacuolar protein sorting-associated protein 4A                     | Vps4a   | 0 | 10 |
| 60S ribosomal protein L13a                                               | Rpl13a   | 1 | 5 | WD repeat-containing protein 91                                    | Wdr91   | 0 | 10 |
| ADP-ribosylation factor-like protein 6-interacting protein 1             | Arl6ip1  | 1 | 5 | Rho guanine nucleotide exchange factor 2                           | Arhgef2 | 1 | 9  |
| ATP synthase subunit f, mitochondrial                                    | Atp5j2   | 1 | 5 | Serine/threonine-protein phosphatase 4 regulatory subunit 2        | Ppp4r2  | 1 | 9  |
| Catenin delta-1                                                          | Ctnnd1   | 1 | 5 | Arf-GAP with GTPase, ANK repeat and PH domain-containing protein 3 | Agap3   | 0 | 9  |
| Condensin complex subunit 1                                              | Ncapd2   | 1 | 5 | cAMP-dependent protein kinase type II-alpha                        | Prkar2a | 0 | 9  |

|                                                                 |         |   |   |                                                             |          |   |   |
|-----------------------------------------------------------------|---------|---|---|-------------------------------------------------------------|----------|---|---|
|                                                                 |         |   |   | regulatory subunit                                          |          |   |   |
| Copine-2                                                        | Cpne2   | 1 | 5 | CAP-Gly domain-containing linker protein 2                  | Clip2    | 0 | 9 |
| Cytoplasmic dynein 1 intermediate chain 2                       | Dync1i2 | 1 | 5 | Diphosphoinositol polyphosphate phosphohydrolase 1          | Nudt3    | 0 | 9 |
| Dihydrofolate reductase                                         | Dhfr    | 1 | 5 | Ester hydrolase C11orf54 homolog                            |          | 0 | 9 |
| Dynactin subunit 2                                              | Dctn2   | 1 | 5 | Eukaryotic translation initiation factor 3 subunit L        | Eif3l    | 0 | 9 |
| Immunity-related GTPase family Q protein                        | Irgq    | 1 | 5 | Hepatoma-derived growth factor                              | Hdgf     | 0 | 9 |
| Long-chain-fatty-acid--CoA ligase 4                             | Acs14   | 1 | 5 | Histone deacetylase 6                                       | Hdac6    | 0 | 9 |
| Nucleoporin NUP188 homolog                                      | Nup188  | 1 | 5 | Histone H2A.V                                               | H2afv    | 0 | 9 |
| Sorting nexin-1                                                 | Snx1    | 1 | 5 | Hydroxyacyl-coenzyme A dehydrogenase, mitochondrial         | Hadh     | 0 | 9 |
| Striatin-4                                                      | Strn4   | 1 | 5 | Luc7-like protein 3                                         | Luc7l3   | 0 | 9 |
| Thioredoxin-related transmembrane protein 2                     | Tmx2    | 1 | 5 | NFATC2-interacting protein                                  | Nfatc2ip | 0 | 9 |
| Trans-2,3-enoyl-CoA reductase                                   | Tecr    | 1 | 5 | Nuclear RNA export factor 1                                 | Nxf1     | 0 | 9 |
| Zinc finger CCCH domain-containing protein 4                    | Zc3h4   | 1 | 5 | Serine/threonine-protein phosphatase 6 regulatory subunit 3 | Saps3    | 0 | 9 |
| 60S acidic ribosomal protein P1                                 | Rplp1   | 0 | 5 | Translin                                                    | Tsn      | 0 | 9 |
| Branched-chain-amino-acid aminotransferase, cytosolic           | Bcat1   | 0 | 5 | tRNA (guanine-N(7)-)-methyltransferase subunit WDR4         | Wdr4     | 0 | 9 |
| Catenin alpha-2                                                 | Ctnna2  | 0 | 5 | U2-associated protein SR140                                 | Sr140    | 0 | 9 |
| Cyclic AMP-responsive element-binding protein 1                 | Creb1   | 0 | 5 | UPF0600 protein C5orf51 homolog                             |          | 0 | 9 |
| Ester hydrolase C11orf54 homolog                                |         | 0 | 5 | Uridine 5~-monophosphate synthase                           | Umps     | 0 | 9 |
| Eukaryotic translation initiation factor 3 subunit G            | Eif3g   | 0 | 5 | WD repeat and FYVE domain-containing protein 3              | Wdfy3    | 0 | 9 |
| Glutamate--cysteine ligase catalytic subunit                    | Gclc    | 0 | 5 | 60S ribosomal protein L26                                   | Rpl26    | 1 | 8 |
| GrpE protein homolog 1, mitochondrial                           | Grpel1  | 0 | 5 | Cytosolic acyl coenzyme A thioester hydrolase               | Acot7    | 1 | 8 |
| Guanine nucleotide-binding protein subunit alpha-13             | Gna13   | 0 | 5 | Glucose-6-phosphate isomerase                               | Gpi      | 1 | 8 |
| Histone H1.0                                                    | H1f0    | 0 | 5 | Nipped-B-like protein                                       | Nipbl    | 1 | 8 |
| Inorganic pyrophosphatase 2, mitochondrial                      | Ppa2    | 0 | 5 | Serine/arginine repetitive matrix protein 2                 | Srrm2    | 1 | 8 |
| Mitochondrial import inner membrane translocase subunit Tim17-B | Timm17b | 0 | 5 | 2-amino-3-ketobutyrate coenzyme A ligase, mitochondrial     | Gcat     | 0 | 8 |
| Parafibromin                                                    | Cdc73   | 0 | 5 | AMP deaminase 2                                             | Ampd2    | 0 | 8 |



|                                                                               |        |   |   |                                                          |          |   |   |
|-------------------------------------------------------------------------------|--------|---|---|----------------------------------------------------------|----------|---|---|
| Protein<br>farnesyltransferase/geranylgeranyltransferase type-1 subunit alpha | Fnta   | 0 | 5 | C-Jun-amino-terminal kinase-interacting protein 3        | Mapk8ip3 | 0 | 8 |
| Protein phosphatase 1A                                                        | Ppm1a  | 0 | 5 | Constitutive coactivator of PPAR-gamma-like protein 1    | FAM120A  | 0 | 8 |
| Septin-10                                                                     | Sept10 | 0 | 5 | Diphosphoinositol polyphosphate phosphohydrolase 3-alpha | Nudt10   | 0 | 8 |
| Serine/threonine-protein kinase 24                                            | Stk24  | 0 | 5 | Elongator complex protein 4                              | Elp4     | 0 | 8 |
| Sister chromatid cohesion protein PDS5 homolog B                              | Pds5b  | 0 | 5 | Hamartin                                                 | Tsc1     | 0 | 8 |
| Testis-expressed sequence 10 protein                                          | Tex10  | 0 | 5 | Hemoglobin subunit beta-1                                | Hbb-b1   | 0 | 8 |
| tRNA-dihydrouridine synthase 3-like                                           | Dus3l  | 0 | 5 | Microsomal glutathione S-transferase 3                   | Mgst3    | 0 | 8 |
| Ubiquitin-conjugating enzyme E2 L3                                            | Ube2l3 | 0 | 5 | Mitochondrial-processing peptidase subunit beta          | Pmpcb    | 0 | 8 |
| Ubiquitin-conjugating enzyme E2 variant 2                                     | Ube2v2 | 0 | 5 | Myotubularin-related protein 5                           | Sbf1     | 0 | 8 |
|                                                                               |        |   |   | NAD-dependent malic enzyme, mitochondrial                | Me2      | 0 | 8 |
|                                                                               |        |   |   | Phosphorylated adapter RNA export protein                | Phax     | 0 | 8 |
|                                                                               |        |   |   | Pre-mRNA-processing factor 40 homolog A                  | Prpf40a  | 0 | 8 |
|                                                                               |        |   |   | Protein prune homolog                                    | Prune    | 0 | 8 |
|                                                                               |        |   |   | Putative ATP-dependent RNA helicase DHX57                | Dhx57    | 0 | 8 |
|                                                                               |        |   |   | Ral GTPase-activating protein subunit alpha-1            | Ralgapa1 | 0 | 8 |
|                                                                               |        |   |   | Ras-related protein Rab-5B                               | Rab5b    | 0 | 8 |
|                                                                               |        |   |   | RNA-binding protein 4                                    | Rbm4     | 0 | 8 |
|                                                                               |        |   |   | Selenium-binding protein 1                               | Selenbp1 | 0 | 8 |
|                                                                               |        |   |   | Serine/threonine-protein kinase WNK2                     | Wnk2     | 0 | 8 |
|                                                                               |        |   |   | T-complex protein 11-like protein 1                      | Tcp11l1  | 0 | 8 |
|                                                                               |        |   |   | Terminal uridylyltransferase 4                           | Zcchc11  | 0 | 8 |
|                                                                               |        |   |   | Ubiquitin carboxyl-terminal hydrolase 34                 | Usp34    | 0 | 8 |
|                                                                               |        |   |   | Ubiquitin-conjugating enzyme E2 L3                       | Ube2l3   | 0 | 8 |
|                                                                               |        |   |   | Zinc finger protein neuro-d4                             | Dpf1     | 0 | 8 |
|                                                                               |        |   |   | AP-3 complex subunit delta-1                             | Ap3d1    | 1 | 7 |
|                                                                               |        |   |   | CCR4-NOT transcription complex subunit 7                 | Cnot7    | 1 | 7 |
|                                                                               |        |   |   | E3 ubiquitin-protein ligase TRIM33                       | Trim33   | 1 | 7 |
|                                                                               |        |   |   | E3 ubiquitin-protein ligase TTC3                         | Ttc3     | 1 | 7 |

|                                                                         |          |   |   |
|-------------------------------------------------------------------------|----------|---|---|
| Isopentenyl-diphosphate Delta-isomerase 1                               | Idi1     | 1 | 7 |
| Prolactin regulatory element-binding protein                            | Preb     | 1 | 7 |
| Scavenger mRNA-decapping enzyme DcpS                                    | Dcps     | 1 | 7 |
| Spermatogenesis-associated serine-rich protein 2                        | Spats2   | 1 | 7 |
| Torsin-1A-interacting protein 1                                         | Tor1aip1 | 1 | 7 |
| Transcriptional repressor p66-beta                                      | Gatad2b  | 1 | 7 |
| Aminoacyl tRNA synthetase complex-interacting multifunctional protein 1 | Aimp1    | 0 | 7 |
| Aminoacyl tRNA synthetase complex-interacting multifunctional protein 2 | Aimp2    | 0 | 7 |
| Caspase-6                                                               | Casp6    | 0 | 7 |
| Catenin delta-2                                                         | Ctnnd2   | 0 | 7 |
| Cell division control protein 2 homolog                                 | Cdc2     | 0 | 7 |
| E3 ubiquitin-protein ligase BRE1A                                       | Rnf20    | 0 | 7 |
| Fibronectin type III and SPRY domain-containing protein 1               | Fsd1     | 0 | 7 |
| GTP-binding protein 1                                                   | Gtpbp1   | 0 | 7 |
| Guanine nucleotide-binding protein subunit alpha-13                     | Gna13    | 0 | 7 |
| Histone H3.2                                                            | Hist1h3b | 0 | 7 |
| Histone-binding protein RBBP7                                           | Rbbp7    | 0 | 7 |
| Hydroxymethylglutaryl-CoA lyase, mitochondrial                          | Hmgcl    | 0 | 7 |
| Integrator complex subunit 5                                            | Ints5    | 0 | 7 |
| Kinesin light chain 2                                                   | Klc2     | 0 | 7 |
| NAC-alpha domain-containing protein 1                                   | Nacad    | 0 | 7 |
| Nuclear-interacting partner of ALK                                      | Zc3hc1   | 0 | 7 |
| Phosphatidylinositol-5-phosphate 4-kinase type-2 beta                   | Pip4k2b  | 0 | 7 |
| Poly(A)-specific ribonuclease PARN                                      | Parn     | 0 | 7 |
| Protein fto                                                             | Fto      | 0 | 7 |
| Protein phosphatase Slingshot homolog 2                                 | Ssh2     | 0 | 7 |
| Protein VAC14 homolog                                                   | Vac14    | 0 | 7 |
| Ras-related protein Rab-8B                                              | Rab8b    | 0 | 7 |
| Septin-10                                                               | Sept10   | 0 | 7 |



|                                                                              |         |   |   |
|------------------------------------------------------------------------------|---------|---|---|
| Serine/threonine-protein kinase WNK1                                         | Wnk1    | 0 | 7 |
| Testis-expressed sequence 10 protein                                         | Tex10   | 0 | 7 |
| tRNA (adenine-N(1)-)-methyltransferase non-catalytic subunit TRM6            | Trmt6   | 0 | 7 |
| Tuberin                                                                      | Tsc2    | 0 | 7 |
| Type I inositol-3,4-bisphosphate 4-phosphatase                               | Inpp4a  | 0 | 7 |
| Ubiquitin-like modifier-activating enzyme 6                                  | Uba6    | 0 | 7 |
| Uncharacterized protein C19orf43 homolog                                     |         | 0 | 7 |
| Zinc finger protein 609                                                      | Znf609  | 0 | 7 |
| Zinc finger protein 618                                                      | Znf618  | 0 | 7 |
| Ankyrin-2                                                                    | Ank2    | 1 | 6 |
| cAMP-dependent protein kinase catalytic subunit beta                         | Prkacb  | 1 | 6 |
| Cytochrome c oxidase subunit 2                                               | Mtco2   | 1 | 6 |
| Cytosolic Fe-S cluster assembly factor NUBP2                                 | Nubp2   | 1 | 6 |
| Elongator complex protein 3                                                  | Elp3    | 1 | 6 |
| Inactive hydroxysteroid dehydrogenase-like protein 1                         | Hsd1l   | 1 | 6 |
| LanC-like protein 1                                                          | Lancl1  | 1 | 6 |
| NADH dehydrogenase [ubiquinone] 1 alpha subcomplex subunit 10, mitochondrial | Ndufa10 | 1 | 6 |
| Negative elongation factor E                                                 | Rdbp    | 1 | 6 |
| Neurochondrin                                                                | Ncdn    | 1 | 6 |
| Oligosaccharyltransferase complex subunit OSTC                               | Ostc    | 1 | 6 |
| Plasminogen activator inhibitor 1 RNA-binding protein                        | Serbp1  | 1 | 6 |
| Sorting nexin-1                                                              | Snx1    | 1 | 6 |
| Transformation/transcription domain-associated protein                       | Trrap   | 1 | 6 |
| Vacuolar protein sorting-associated protein 18 homolog                       | Vps18   | 1 | 6 |
| Activator of 90 kDa heat shock protein ATPase homolog 1                      | Ahsa1   | 0 | 6 |
| Beta-arrestin-2                                                              | Arrb2   | 0 | 6 |
| Copine-2                                                                     | Cpne2   | 0 | 6 |

|                                                            |          |   |   |
|------------------------------------------------------------|----------|---|---|
| Dual specificity mitogen-activated protein kinase kinase 4 | Map2k4   | 0 | 6 |
| Dynactin subunit 2                                         | Dctn2    | 0 | 6 |
| E3 ubiquitin-protein ligase MARCH5                         | March5   | 0 | 6 |
| Glycine dehydrogenase [decarboxylating], mitochondrial     | Glhc     | 0 | 6 |
| Hemoglobin subunit beta-H1                                 | Hbb-bh1  | 0 | 6 |
| LIM domain and actin-binding protein 1                     | Lima1    | 0 | 6 |
| Multivesicular body subunit 12B                            | Fam125b  | 0 | 6 |
| Nitrilase homolog 1                                        | Nit1     | 0 | 6 |
| N-terminal acetyltransferase B complex subunit MDM20       | Mdm20    | 0 | 6 |
| Nucleoporin NDC1                                           | Tmem48   | 0 | 6 |
| Polymerase delta-interacting protein 2                     | Poldip2  | 0 | 6 |
| Proteasome subunit beta type-2                             | Psmb2    | 0 | 6 |
| Protein enabled homolog                                    | Enah     | 0 | 6 |
| Protein FAM118B                                            | Fam118b  | 0 | 6 |
| Protein NDRG2                                              | Ndr2     | 0 | 6 |
| Protein N-terminal asparagine amidohydrolase               | Ntan1    | 0 | 6 |
| Protein Shroom2                                            | Shroom2  | 0 | 6 |
| Ras-related protein Rab-12                                 | Rab12    | 0 | 6 |
| Ras-related protein Rab-33B                                | Rab33b   | 0 | 6 |
| REST corepressor 2                                         | Rcor2    | 0 | 6 |
| Rho guanine nucleotide exchange factor 7                   | Arhgef7  | 0 | 6 |
| Rho-associated protein kinase 2                            | Rock2    | 0 | 6 |
| SAM domain and HD domain-containing protein 1              | Samhd1   | 0 | 6 |
| Septin-8                                                   | Sept8    | 0 | 6 |
| Serine/threonine-protein kinase MRCK alpha                 | Cdc42bpa | 0 | 6 |
| STIP1 homology and U box-containing protein 1              | Stub1    | 0 | 6 |
| SUMO-conjugating enzyme UBC9                               | Ube2i    | 0 | 6 |
| TBC1 domain family member 24                               | Tbc1d24  | 0 | 6 |
| THUMP domain-containing protein 3                          | Thumpd3  | 0 | 6 |
| Transcriptional activator protein Pur-beta                 | Purb     | 0 | 6 |

|                                                                   |        |   |   |
|-------------------------------------------------------------------|--------|---|---|
| Twinfilin-2                                                       | Twf2   | 0 | 6 |
| U2 small nuclear ribonucleoprotein A~                             | Snrpa1 | 0 | 6 |
| Ubiquitin carboxyl-terminal hydrolase 15                          | Usp15  | 0 | 6 |
| Ubiquitin-conjugating enzyme E2 D3                                | Ube2d3 | 0 | 6 |
| Ubiquitin-like protein 4A                                         | Ubl4a  | 0 | 6 |
| UPF0363 protein C7orf20 homolog                                   |        | 0 | 6 |
| WD repeat domain phosphoinositide-interacting protein 3           | Wdr45l | 0 | 6 |
| Apoptotic chromatin condensation inducer in the nucleus           | Acin1  | 1 | 5 |
| Catenin alpha-2                                                   | Ctnna2 | 1 | 5 |
| COP9 signalosome complex subunit 6                                | Cops6  | 1 | 5 |
| Hematological and neurological expressed 1-like protein           | Hn1l   | 1 | 5 |
| Sterol-4-alpha-carboxylate 3-dehydrogenase, decarboxylating       | Nsdhl  | 1 | 5 |
| Synaptobrevin homolog YKT6                                        | Ykt6   | 1 | 5 |
| Trans-2,3-enoyl-CoA reductase                                     | Tecr   | 1 | 5 |
| AH receptor-interacting protein                                   | Aip    | 0 | 5 |
| Ataxin-2                                                          | Atxn2  | 0 | 5 |
| ATPase WRNIP1                                                     | Wrnip1 | 0 | 5 |
| Beta-arrestin-1                                                   | Arrb1  | 0 | 5 |
| Calcineurin-like phosphoesterase domain-containing protein 1      | Cpped1 | 0 | 5 |
| Calcium/calmodulin-dependent protein kinase type II subunit alpha | Camk2a | 0 | 5 |
| COBW domain-containing protein 1                                  | Cbwd1  | 0 | 5 |
| Cysteine protease ATG4B                                           | Atg4b  | 0 | 5 |
| Derlin-1                                                          | Derl1  | 0 | 5 |
| Endoribonuclease Dicer                                            | Dicer1 | 0 | 5 |
| Gephyrin                                                          | Gphn   | 0 | 5 |
| GTP-binding protein GUF1 homolog                                  | Guf1   | 0 | 5 |
| Histone H3.3                                                      | H3f3a  | 0 | 5 |
| Integrin-linked kinase-associated serine/threonine                | Ilkap  | 0 | 5 |

|                                                                            |          |   |   |
|----------------------------------------------------------------------------|----------|---|---|
| phosphatase 2C                                                             |          |   |   |
| Kinetochore-associated protein 1                                           | Kntc1    | 0 | 5 |
| Lysophosphatidylcholine acyltransferase 1                                  | Lpcat1   | 0 | 5 |
| Mitochondrial import receptor subunit TOM40 homolog                        | Tomm40   | 0 | 5 |
| Mitogen-activated protein kinase 9                                         | Mapk9    | 0 | 5 |
| Myosin light polypeptide 6                                                 | Myl6     | 0 | 5 |
| Myosin-Ib                                                                  | Myo1b    | 0 | 5 |
| Non-syndromic hearing impairment protein 5 homolog                         | Dfna5    | 0 | 5 |
| Nuclear pore complex protein Nup133                                        | Nup133   | 0 | 5 |
| Nuclear valosin-containing protein-like                                    | Nvl      | 0 | 5 |
| Nucleolar protein 9                                                        | No19     | 0 | 5 |
| Phosphomannomutase 2                                                       | Pmm2     | 0 | 5 |
| Phosphoprotein associated with glycosphingolipid-enriched microdomains 1   | Pag1     | 0 | 5 |
| Phosphoribosyl pyrophosphate synthase-associated protein 2                 | Prpsap2  | 0 | 5 |
| Probable saccharopine dehydrogenase                                        | Sccpdh   | 0 | 5 |
| Protein farnesyltransferase/geranylgeranyltransferase type-1 subunit alpha | Fnta     | 0 | 5 |
| Rho GTPase-activating protein 21                                           | Arhgap21 | 0 | 5 |
| Ribosomal RNA processing protein 1 homolog B                               | Rrp1b    | 0 | 5 |
| Striatin                                                                   | Strn     | 0 | 5 |
| TBC domain-containing protein kinase-like protein                          | Tbck     | 0 | 5 |
| T-box brain protein 1                                                      | Tbr1     | 0 | 5 |
| Tubulin-folding cofactor B                                                 | Tbcb     | 0 | 5 |
| Ubiquitin carboxyl-terminal hydrolase 48                                   | Usp48    | 0 | 5 |
| Ubiquitin-fold modifier-conjugating enzyme 1                               | Ufc1     | 0 | 5 |
| Ubiquitin-like modifier-activating enzyme 5                                | Uba5     | 0 | 5 |
| Ubiquitin-protein ligase E3C                                               | Ube3c    | 0 | 5 |
| UBX domain-containing protein 4                                            | Ubxn4    | 0 | 5 |
| YEATS domain-containing protein 4                                          | Yeats4   | 0 | 5 |

---

|                                               |      |   |   |
|-----------------------------------------------|------|---|---|
| YrdC domain-containing protein, mitochondrial | Yrdc | 0 | 5 |
|-----------------------------------------------|------|---|---|

## Supporting Table S2

Sialylated glycoproteins selectively identified with high confidence in coculture or noncoculture samples by mass spectrometry. Identified glycoproteins were categorized into the high-confidence list if they were identified in Ac<sub>4</sub>ManNAz treated samples with  $\geq 5$  spectral counts and  $\geq 5$  folds increase above the vehicle-administered samples and located in cell membrane, ER/Golgi or secreted pathway. Ratio indicated spectral counts of proteins in Ac<sub>4</sub>ManNAz treated coculture over in Ac<sub>4</sub>ManNAz treated noncoculture.

| Protein Name                                          | Gene Name | Coculture |                        | Noncoculture |                        | High confidence in |              | Ratio |
|-------------------------------------------------------|-----------|-----------|------------------------|--------------|------------------------|--------------------|--------------|-------|
|                                                       |           | Blank     | Ac <sub>4</sub> ManNAz | Blank        | Ac <sub>4</sub> ManNAz | Coculture          | Noncoculture |       |
| Neural cell adhesion molecule 1                       | Ncam1     | 9         | 505                    | 11           | 532                    | √                  | √            | 0.95  |
| Prolow-density lipoprotein receptor-related protein 1 | Lrp1      | 7         | 272                    | 12           | 255                    | √                  | √            | 1.07  |
| 4F2 cell-surface antigen heavy chain                  | Slc3a2    | 21        | 102                    | 7            | 61                     |                    | √            | 1.67  |
| Golgi apparatus protein 1                             | Glg1      | 13        | 79                     | 4            | 75                     | √                  | √            | 1.05  |
| Reticulon-4                                           | Rtn4      | 16        | 74                     | 11           | 74                     |                    | √            | 1.00  |
| Leucine-rich repeat-containing protein 4B             | Lrrc4b    | 1         | 72                     | 1            | 62                     | √                  | √            | 1.16  |
| Sodium/potassium-transporting ATPase subunit beta-1   | Atp1b1    | 6         | 70                     | 8            | 67                     | √                  | √            | 1.04  |
| Neuronal membrane glycoprotein M6-a                   | Gpm6a     | 4         | 68                     | 3            | 62                     | √                  | √            | 1.10  |
| Cation-independent mannose-6-phosphate receptor       | Igf2r     | 0         | 67                     | 0            | 52                     | √                  | √            | 1.29  |
| Plexin-B1                                             | Plxnb1    | 0         | 66                     | 1            | 57                     | √                  | √            | 1.16  |
| Ephrin-B1                                             | Efnb1     | 9         | 62                     | 9            | 63                     | √                  | √            | 0.98  |
| Excitatory amino acid transporter 1 (Glast)           | Slc1a3    | 4         | 61                     | 0            | 27                     | √                  | √            | 2.26  |
| Neuronal cell adhesion molecule                       | Nrcam     | 2         | 60                     | 2            | 41                     | √                  | √            | 1.46  |
| Synaptic vesicle glycoprotein 2A                      | Sv2a      | 1         | 57                     | 1            | 31                     | √                  | √            | 1.84  |
| Neuroigin-2                                           | Nlgn2     | 0         | 51                     | 0            | 40                     | √                  | √            | 1.28  |
| Glypican-2                                            | Gpc2      | 0         | 50                     | 0            | 82                     | √                  | √            | 0.61  |
| Contactin-1                                           | Cntn1     | 5         | 49                     | 1            | 24                     | √                  | √            | 2.04  |
| Low-density lipoprotein receptor                      | Ldlr      | 2         | 47                     | 0            | 12                     | √                  | √            | 3.92  |
| Netrin receptor DCC                                   | Dcc       | 2         | 47                     | 5            | 36                     | √                  | √            | 1.31  |

|                                                                     |          |   |    |   |    |   |   |           |
|---------------------------------------------------------------------|----------|---|----|---|----|---|---|-----------|
| V-type proton ATPase 116 kDa subunit a isoform 1                    | Atp6v0a1 | 3 | 46 | 7 | 37 | √ | √ | 1.24      |
| Immunoglobulin superfamily containing leucine-rich repeat protein 2 | Islr2    | 0 | 46 | 1 | 38 | √ | √ | 1.21      |
| Neurologin-3                                                        | Nlgn3    | 3 | 46 | 1 | 58 | √ | √ | 0.79      |
| Receptor-type tyrosine-protein phosphatase alpha                    | Ptpa     | 1 | 45 | 0 | 34 | √ | √ | 1.32      |
| Sodium- and chloride-dependent GABA transporter 3                   | Slc6a11  | 4 | 44 | 3 | 25 | √ | √ | 1.76      |
| Coxsackievirus and adenovirus receptor homolog                      | Cxadr    | 1 | 44 | 0 | 37 | √ | √ | 1.19      |
| Integrin beta-1                                                     | Itgb1    | 2 | 42 | 0 | 26 | √ | √ | 1.62      |
| Transferrin receptor protein 1                                      | Tfrc     | 4 | 39 | 1 | 36 | √ | √ | 1.08      |
| Neurofascin                                                         | Nfasc    | 0 | 38 | 0 | 22 | √ | √ | 1.73      |
| Neogenin                                                            | Neol     | 0 | 35 | 0 | 34 | √ | √ | 1.03      |
| Sodium/potassium-transporting ATPase subunit beta-3                 | Atp1b3   | 0 | 34 | 0 | 37 | √ | √ | 0.92      |
| Versican core protein                                               | Vcan     | 0 | 33 | 0 | 18 | √ | √ | 1.83      |
| Integrin alpha-6                                                    | Itga6    | 3 | 33 | 0 | 23 | √ | √ | 1.43      |
| Immunoglobulin superfamily member 3                                 | Igsf3    | 0 | 33 | 0 | 35 | √ | √ | 0.94      |
| Neural cell adhesion molecule 2                                     | Ncam2    | 0 | 32 | 0 | 15 | √ | √ | 2.13      |
| Neuronal membrane glycoprotein M6-b                                 | Gpm6b    | 2 | 32 | 0 | 26 | √ | √ | 1.23      |
| Cell adhesion molecule 4                                            | Cadm4    | 0 | 32 | 0 | 41 | √ | √ | 0.78      |
| Neural cell adhesion molecule L1                                    | L1cam    | 0 | 31 | 0 | 17 | √ | √ | 1.82      |
| Carboxypeptidase D                                                  | Cpd      | 0 | 31 | 0 | 34 | √ | √ | 0.91      |
| Glypican-4                                                          | Gpc4     | 1 | 31 | 2 | 48 | √ | √ | 0.65      |
| Chondroitin sulfate proteoglycan 4 (NG2)                            | Cspg4    | 0 | 30 | 0 | 0  | √ |   | 60.0<br>0 |
| Sodium- and chloride-dependent taurine transporter                  | Slc6a6   | 2 | 30 | 1 | 8  | √ | √ | 3.75      |
| Reticulon-1                                                         | Rtn1     | 2 | 29 | 3 | 18 | √ | √ | 1.61      |
| Ephrin type-B receptor 2                                            | Ephb2    | 0 | 29 | 0 | 23 | √ | √ | 1.26      |
| Neuropilin-2                                                        | Nrp2     | 0 | 29 | 0 | 27 | √ | √ | 1.07      |
| Lactadherin                                                         | Mfge8    | 0 | 29 | 0 | 32 | √ | √ | 0.91      |

|                                                                      |          |   |    |   |    |   |   |           |
|----------------------------------------------------------------------|----------|---|----|---|----|---|---|-----------|
| Delta and Notch-like epidermal growth factor-related receptor        | Dner     | 0 | 28 | 0 | 12 | √ | √ | 2.33      |
| Solute carrier family 2, facilitated glucose transporter member 1    | Slc2a1   | 2 | 28 | 0 | 22 | √ | √ | 1.27      |
| Cadherin-2                                                           | Cdh2     | 0 | 28 | 0 | 26 | √ | √ | 1.08      |
| Agrin                                                                | Agrn     | 0 | 28 | 0 | 47 | √ | √ | 0.60      |
| Glucosylceramidase                                                   | Gba      | 0 | 26 | 4 | 22 | √ | √ | 1.18      |
| Solute carrier family 12 member 5                                    | Slc12a5  | 0 | 26 | 0 | 27 | √ | √ | 0.96      |
| Roundabout homolog 2                                                 | Robo2    | 2 | 25 | 3 | 14 | √ |   | 1.79      |
| Protocadherin Fat 3                                                  | Fat3     | 0 | 25 | 1 | 32 | √ | √ | 0.78      |
| EGF-like repeat and discoidin I-like domain-containing protein 3     | Edil3    | 0 | 24 | 0 | 20 | √ | √ | 1.20      |
| BDNF/NT-3 growth factors receptor                                    | Ntrk2    | 0 | 23 | 0 | 14 | √ | √ | 1.64      |
| Chloride transport protein 6                                         | Clcn6    | 0 | 23 | 0 | 18 | √ | √ | 1.28      |
| Latrophilin-3                                                        | Lphn3    | 0 | 23 | 0 | 20 | √ | √ | 1.15      |
| Nicastrin                                                            | Nestn    | 1 | 23 | 1 | 20 | √ | √ | 1.15      |
| Voltage-dependent calcium channel subunit alpha-2/delta-1            | Cacna2d1 | 0 | 23 | 0 | 30 | √ | √ | 0.77      |
| Large neutral amino acids transporter small subunit 1                | Slc7a5   | 1 | 22 | 0 | 13 | √ | √ | 1.69      |
| Cell adhesion molecule 2                                             | Cadm2    | 0 | 22 | 0 | 14 | √ | √ | 1.57      |
| Sulfhydryl oxidase 2                                                 | Qsox2    | 0 | 21 | 0 | 8  | √ | √ | 2.63      |
| Excitatory amino acid transporter 2                                  | Slc1a2   | 0 | 21 | 0 | 11 | √ | √ | 1.91      |
| Basement membrane-specific heparan sulfate proteoglycan core protein | Hspg2    | 0 | 20 | 0 | 16 | √ | √ | 1.25      |
| CD166 antigen                                                        | Alcam    | 0 | 19 | 0 | 0  | √ |   | 38.0<br>0 |
| Leucyl-cystinyl aminopeptidase                                       | Lnpep    | 0 | 19 | 0 | 12 | √ | √ | 1.58      |
| Neutral amino acid transporter A                                     | Slc1a4   | 0 | 19 | 0 | 16 | √ | √ | 1.19      |
| Receptor-type tyrosine-protein phosphatase gamma                     | Ptprg    | 0 | 18 | 0 | 5  | √ | √ | 3.60      |
| Lymphocyte antigen 6H                                                | Ly6h     | 0 | 18 | 1 | 10 | √ | √ | 1.80      |
| Protein CASC4                                                        | Casc4    | 0 | 18 | 0 | 13 | √ | √ | 1.38      |



|                                                        |           |   |    |   |    |   |   |           |
|--------------------------------------------------------|-----------|---|----|---|----|---|---|-----------|
| Neuroplastin                                           | Nptn      | 0 | 18 | 0 | 14 | √ | √ | 1.29      |
| Lysosomal acid phosphatase                             | Acp2      | 0 | 18 | 0 | 16 | √ | √ | 1.13      |
| Anoctamin-6                                            | Ano6      | 0 | 18 | 0 | 17 | √ | √ | 1.06      |
| Leucine-rich repeat-containing protein 8A              | Lrrc8a    | 0 | 18 | 0 | 17 | √ | √ | 1.06      |
| Neurocan core protein                                  | Ncan      | 0 | 18 | 0 | 18 | √ | √ | 1.00      |
| Lysosome membrane protein 2                            | Scarb2    | 0 | 18 | 0 | 24 | √ | √ | 0.75      |
| Epidermal growth factor receptor                       | Egfr      | 1 | 17 | 0 | 0  | √ |   | 34.0<br>0 |
| Limbic system-associated membrane protein              | Lsamp     | 0 | 17 | 0 | 6  | √ | √ | 2.83      |
| Sodium bicarbonate cotransporter 3                     | Slc4a7    | 0 | 17 | 0 | 13 | √ | √ | 1.31      |
| Tyrosine-protein kinase-like 7                         | Ptk7      | 2 | 17 | 1 | 13 | √ | √ | 1.31      |
| Immunoglobulin superfamily member 21                   | Igsf21    | 0 | 16 | 0 | 3  | √ |   | 5.33      |
| Tenascin                                               | Tnc       | 2 | 16 | 1 | 4  | √ |   | 4.00      |
| OX-2 membrane glycoprotein                             | Cd200     | 2 | 16 | 0 | 9  | √ | √ | 1.78      |
| Astrotactin-1                                          | Astn1     | 1 | 16 | 0 | 12 | √ | √ | 1.33      |
| Synaptotagmin-1                                        | Syt1      | 0 | 16 | 0 | 12 | √ | √ | 1.33      |
| Phosphatidylinositol-binding clathrin assembly protein | Picalm    | 4 | 16 | 0 | 12 |   | √ | 1.33      |
| G-protein coupled receptor 56                          | Gpr56     | 0 | 16 | 0 | 15 | √ | √ | 1.07      |
| Immunoglobulin superfamily DCC subclass member 4       | Igdcc4    | 0 | 16 | 0 | 15 | √ | √ | 1.07      |
| Sodium- and chloride-dependent GABA transporter 1      | Slc6a1    | 2 | 16 | 1 | 16 | √ | √ | 1.00      |
| SLIT-ROBO Rho GTPase-activating protein 2              | Srgap2    | 3 | 16 | 1 | 19 | √ | √ | 0.84      |
| Prominin-1                                             | Prom1     | 0 | 16 | 0 | 20 | √ | √ | 0.80      |
| Electrogenic sodium bicarbonate cotransporter 1        | Slc4a4    | 0 | 15 | 0 | 2  | √ |   | 7.50      |
| Integrin alpha-5                                       | Itga5     | 0 | 15 | 0 | 10 | √ | √ | 1.50      |
| Uncharacterized protein KIAA0319-like                  | Kiaa0319l | 0 | 15 | 0 | 10 | √ | √ | 1.50      |
| Cell cycle control protein 50A                         | Tmem30a   | 0 | 15 | 0 | 13 | √ | √ | 1.15      |
| GPI inositol-deacylase                                 | Pgap1     | 4 | 15 | 0 | 15 |   | √ | 1.00      |
| Transmembrane 9 superfamily member 3                   | Tm9sf3    | 0 | 15 | 0 | 28 | √ | √ | 0.54      |
| Insulin-like growth factor 1 receptor                  | Igf1r     | 0 | 15 | 0 | 35 | √ | √ | 0.43      |

|                                                                                                   |         |   |    |   |    |   |   |           |
|---------------------------------------------------------------------------------------------------|---------|---|----|---|----|---|---|-----------|
| Leucine-rich repeat and immunoglobulin-like domain-containing nogo receptor-interacting protein 1 | Lingo1  | 0 | 14 | 0 | 0  | √ |   | 28.0<br>0 |
| Transmembrane emp24 domain-containing protein 4                                                   | Tmed4   | 0 | 14 | 0 | 9  | √ | √ | 1.56      |
| Cell adhesion molecule 3                                                                          | Cadm3   | 0 | 14 | 0 | 14 | √ | √ | 1.00      |
| Podocalyxin-like protein 2                                                                        | Podxl2  | 0 | 14 | 0 | 14 | √ | √ | 1.00      |
| Ephrin-B2                                                                                         | Efnb2   | 0 | 14 | 0 | 29 | √ | √ | 0.48      |
| Neuropilin-1                                                                                      | Nrp1    | 0 | 13 | 0 | 7  | √ | √ | 1.86      |
| Repulsive guidance molecule A                                                                     | Rgma    | 0 | 13 | 0 | 7  | √ | √ | 1.86      |
| Solute carrier family 12 member 9                                                                 | Slc12a9 | 0 | 13 | 0 | 7  | √ | √ | 1.86      |
| Seizure protein 6                                                                                 | Sez6    | 0 | 13 | 0 | 8  | √ | √ | 1.63      |
| Low-density lipoprotein receptor-related protein 8                                                | Lrp8    | 0 | 13 | 0 | 9  | √ | √ | 1.44      |
| Solute carrier family 12 member 7                                                                 | Slc12a7 | 0 | 13 | 0 | 9  | √ | √ | 1.44      |
| Transmembrane emp24 domain-containing protein 9                                                   | Tmed9   | 1 | 13 | 0 | 9  | √ | √ | 1.44      |
| Reticulon-4 receptor-like 2                                                                       | Rtn4rl2 | 0 | 13 | 0 | 11 | √ | √ | 1.18      |
| Trophoblast glycoprotein                                                                          | Tpbpg   | 0 | 13 | 0 | 13 | √ | √ | 1.00      |
| Integrin alpha-V                                                                                  | Itgav   | 0 | 13 | 0 | 15 | √ | √ | 0.87      |
| Basigin                                                                                           | Bsg     | 1 | 13 | 0 | 16 | √ | √ | 0.81      |
| Amyloid beta A4 protein                                                                           | App     | 0 | 12 | 0 | 2  | √ |   | 6.00      |
| Lysosome-associated membrane glycoprotein 2                                                       | Lamp2   | 1 | 12 | 0 | 2  | √ |   | 6.00      |
| Golgi integral membrane protein 4                                                                 | Golim4  | 0 | 12 | 0 | 3  | √ |   | 4.00      |
| Inositol monophosphatase 3                                                                        | Impad1  | 0 | 12 | 0 | 4  | √ |   | 3.00      |
| Sodium/potassium-transporting ATPase subunit beta-2                                               | Atp1b2  | 0 | 12 | 0 | 4  | √ |   | 3.00      |
| High affinity cationic amino acid transporter 1                                                   | Slc7a1  | 0 | 12 | 0 | 7  | √ | √ | 1.71      |
| Protein tweety homolog 1                                                                          | Ttyh1   | 0 | 12 | 0 | 9  | √ | √ | 1.33      |
| Solute carrier family 12 member 2                                                                 | Slc12a2 | 0 | 12 | 0 | 9  | √ | √ | 1.33      |
| Poliovirus receptor-related protein 2                                                             | Pvrl2   | 0 | 12 | 0 | 11 | √ | √ | 1.09      |
| Neurotrimin                                                                                       | Ntm     | 0 | 12 | 0 | 12 | √ | √ | 1.00      |
| Niemann-Pick C1 protein                                                                           | Npc1    | 0 | 12 | 1 | 12 | √ | √ | 1.00      |

|                                                                        |         |   |    |   |    |   |   |       |
|------------------------------------------------------------------------|---------|---|----|---|----|---|---|-------|
| Plexin-A2                                                              | Plxna2  | 0 | 12 | 1 | 26 | √ | √ | 0.46  |
| Alkaline phosphatase, tissue-nonspecific isozyme                       | Alpl    | 0 | 11 | 0 | 1  | √ |   | 11.00 |
| Immunoglobulin superfamily member 8                                    | Igsf8   | 0 | 11 | 0 | 4  | √ |   | 2.75  |
| Contactin-4                                                            | Cntn4   | 0 | 11 | 0 | 5  | √ | √ | 2.20  |
| Protein tweety homolog 3                                               | Ttyh3   | 0 | 11 | 0 | 5  | √ | √ | 2.20  |
| Neurexin-1-alpha                                                       | Nrxn1   | 0 | 11 | 0 | 7  | √ | √ | 1.57  |
| Neuronal growth regulator 1                                            | Negr1   | 0 | 11 | 0 | 8  | √ | √ | 1.38  |
| Protein FAM3C                                                          | Fam3c   | 3 | 11 | 0 | 8  |   | √ | 1.38  |
| Alpha-1,6-mannosyl-glycoprotein 2-beta-N-acetylglucosaminyltransferase | Mgat2   | 0 | 11 | 0 | 9  | √ | √ | 1.22  |
| Solute carrier family 23 member 2                                      | Slc23a2 | 0 | 11 | 0 | 9  | √ | √ | 1.22  |
| Latrophilin-2 (Fragment)                                               | Lphn2   | 0 | 11 | 0 | 10 | √ | √ | 1.10  |
| Tetraspanin-6                                                          | Tspan6  | 0 | 11 | 0 | 10 | √ | √ | 1.10  |
| Glypican-1                                                             | Gpc1    | 0 | 11 | 0 | 23 | √ | √ | 0.48  |
| Polypeptide N-acetylgalactosaminyltransferase 1                        | Galnt1  | 0 | 10 | 0 | 1  | √ |   | 10.00 |
| Cell adhesion molecule 1                                               | Cadm1   | 0 | 10 | 0 | 2  | √ |   | 5.00  |
| Alpha-type platelet-derived growth factor receptor                     | Pdgfra  | 0 | 10 | 0 | 3  | √ |   | 3.33  |
| Sodium/myo-inositol cotransporter                                      | Slc5a3  | 0 | 10 | 0 | 3  | √ |   | 3.33  |
| Armado repeat-containing protein 10                                    | Armc10  | 1 | 10 | 0 | 9  | √ | √ | 1.11  |
| Contactin-6                                                            | Cntn6   | 0 | 10 | 0 | 9  | √ | √ | 1.11  |
| Seizure 6-like protein 2                                               | Sez6l2  | 0 | 10 | 0 | 9  | √ | √ | 1.11  |
| Sodium- and chloride-dependent creatine transporter 1                  | Slc6a8  | 0 | 10 | 0 | 10 | √ | √ | 1.00  |
| Tetraspanin-7                                                          | Tspan7  | 0 | 10 | 0 | 10 | √ | √ | 1.00  |
| Latrophilin-1                                                          | Lphn1   | 0 | 10 | 0 | 14 | √ | √ | 0.71  |
| Ciliary neurotrophic factor receptor subunit alpha                     | Cntfr   | 0 | 10 | 0 | 15 | √ | √ | 0.67  |
| Leucine-rich repeat neuronal protein 1                                 | Lrrn1   | 0 | 9  | 0 | 2  | √ |   | 4.50  |
| Receptor-type tyrosine-protein phosphatase eta                         | Ptprj   | 0 | 9  | 0 | 2  | √ |   | 4.50  |
| Gamma-glutamyltransferase 7                                            | Ggt7    | 0 | 9  | 0 | 4  | √ |   | 2.25  |
| Ephrin type-A receptor 4                                               | Epha4   | 0 | 9  | 0 | 8  | √ | √ | 1.13  |

|                                                    |          |   |   |   |    |   |   |           |
|----------------------------------------------------|----------|---|---|---|----|---|---|-----------|
| Ephrin-B3                                          | Efnb3    | 0 | 9 | 0 | 16 | √ | √ | 0.56      |
| Transmembrane protein 2                            | Tmem2    | 0 | 9 | 0 | 18 | √ | √ | 0.50      |
| Choline transporter-like protein 2                 | Slc44a2  | 0 | 8 | 0 | 1  | √ |   | 8.00      |
| CD44 antigen                                       | Cd44     | 0 | 8 | 0 | 2  | √ |   | 4.00      |
| Nidogen-1                                          | Nid1     | 0 | 8 | 0 | 2  | √ |   | 4.00      |
| Very low-density lipoprotein receptor              | Vldlr    | 0 | 8 | 0 | 2  | √ |   | 4.00      |
| Lipid phosphate phosphatase-related protein type 3 | Lppr3    | 0 | 8 | 0 | 3  | √ |   | 2.67      |
| Brevican core protein                              | Bcan     | 1 | 8 | 0 | 4  | √ |   | 2.00      |
| SLIT and NTRK-like protein 2                       | Slitrk2  | 0 | 8 | 0 | 5  | √ | √ | 1.60      |
| Tenascin-R                                         | Tnr      | 0 | 8 | 0 | 6  | √ | √ | 1.33      |
| ATP-binding cassette sub-family D member 3         | Abcd3    | 5 | 8 | 1 | 6  |   | √ | 1.33      |
| Uncharacterized protein KIAA1211                   | Kiaa1211 | 2 | 8 | 0 | 6  |   | √ | 1.33      |
| SLIT and NTRK-like protein 4                       | Slitrk4  | 0 | 8 | 0 | 10 | √ | √ | 0.80      |
| Cadherin EGF LAG seven-pass G-type receptor 3      | Celsr3   | 0 | 8 | 0 | 15 | √ | √ | 0.53      |
| Insulin receptor                                   | Insr     | 0 | 8 | 0 | 23 | √ | √ | 0.35      |
| UPF0635 protein C6orf134 homolog                   |          | 1 | 8 | 3 | 29 | √ | √ | 0.28      |
| Basic fibroblast growth factor receptor 1          | Fgfr1    | 0 | 7 | 0 | 0  | √ |   | 14.0<br>0 |
| Beta-1,4-galactosyltransferase 5                   | B4galt5  | 0 | 7 | 0 | 0  | √ |   | 14.0<br>0 |
| Transmembrane protein 132E                         | Tmem132e | 0 | 7 | 0 | 0  | √ |   | 14.0<br>0 |
| Poliovirus receptor-related protein 1              | Pvr11    | 0 | 7 | 0 | 1  | √ |   | 7.00      |
| UPF0552 protein C15orf38 homolog                   |          | 0 | 7 | 0 | 3  | √ |   | 2.33      |
| Prostaglandin F2 receptor negative regulator       | Ptgfrn   | 0 | 7 | 0 | 4  | √ |   | 1.75      |
| GDNF family receptor alpha-2                       | Gfra2    | 0 | 7 | 0 | 5  | √ | √ | 1.40      |
| Transmembrane protein 9                            | Tmem9    | 0 | 7 | 0 | 5  | √ | √ | 1.40      |
| Dystroglycan                                       | Dag1     | 0 | 7 | 0 | 7  | √ | √ | 1.00      |
| Protocadherin Fat 4                                | Fat4     | 0 | 7 | 0 | 9  | √ | √ | 0.78      |
| SLIT and NTRK-like protein 1                       | Slitrk1  | 0 | 7 | 0 | 9  | √ | √ | 0.78      |
| Glutamate receptor 2                               | Gria2    | 0 | 7 | 0 | 12 | √ | √ | 0.58      |

|                                                                         |          |   |   |   |    |   |   |           |
|-------------------------------------------------------------------------|----------|---|---|---|----|---|---|-----------|
| Glypican-6                                                              | Gpc6     | 0 | 7 | 0 | 13 | √ | √ | 0.54      |
| Alpha-mannosidase 2C1                                                   | Man2c1   | 1 | 7 | 1 | 14 | √ | √ | 0.50      |
| Sphingomyelin phosphodiesterase 2                                       | Smpd2    | 1 | 7 | 0 | 15 | √ | √ | 0.47      |
| C-type mannose receptor 2                                               | Mrc2     | 0 | 6 | 0 | 0  | √ |   | 12.0<br>0 |
| Orphan sodium- and chloride-dependent neurotransmitter transporter NTT4 | Slc6a17  | 0 | 6 | 0 | 0  | √ |   | 12.0<br>0 |
| Solute carrier family 22 member 23                                      | Slc22a23 | 0 | 6 | 0 | 0  | √ |   | 12.0<br>0 |
| Tetraspanin-31                                                          | Tspan31  | 1 | 6 | 0 | 0  | √ |   | 12.0<br>0 |
| Protein ITFG3                                                           | Itfg3    | 0 | 6 | 0 | 1  | √ |   | 6.00      |
| IgLON family member 5                                                   | Iglon5   | 0 | 6 | 0 | 2  | √ |   | 3.00      |
| Keratinocyte-associated transmembrane protein 2                         | Kct2     | 0 | 6 | 0 | 2  | √ |   | 3.00      |
| Sortilin                                                                | Sort1    | 0 | 6 | 0 | 2  | √ |   | 3.00      |
| Uncharacterized protein KIAA1467                                        | Kiaa1467 | 0 | 6 | 0 | 2  | √ |   | 3.00      |
| Protein dispatched homolog 2                                            | Disp2    | 0 | 6 | 0 | 4  | √ |   | 1.50      |
| Protein FAM20B                                                          | Fam20b   | 0 | 6 | 0 | 4  | √ |   | 1.50      |
| Vezatin                                                                 | Vezt     | 0 | 6 | 0 | 4  | √ |   | 1.50      |
| Dolichyl-phosphate beta-glucosyltransferase                             | Alg5     | 0 | 6 | 0 | 6  | √ | √ | 1.00      |
| Leukocyte surface antigen CD47                                          | Cd47     | 0 | 6 | 0 | 6  | √ | √ | 1.00      |
| Voltage-dependent calcium channel subunit alpha-2/delta-2               | Cacna2d2 | 0 | 6 | 0 | 6  | √ | √ | 1.00      |
| Sodium-coupled neutral amino acid transporter 1                         | Slc38a1  | 0 | 6 | 0 | 7  | √ | √ | 0.86      |
| Phospholipase D3                                                        | Pld3     | 0 | 6 | 2 | 12 | √ | √ | 0.50      |
| Secreted frizzled-related protein 1                                     | Sfrp1    | 4 | 6 | 1 | 24 |   | √ | 0.25      |
| Potassium-transporting ATPase alpha chain 1                             | Atp4a    | 0 | 5 | 0 | 0  | √ |   | 10.0<br>0 |
| Vascular cell adhesion protein 1                                        | Vcam1    | 0 | 5 | 0 | 0  | √ |   | 10.0<br>0 |
| Voltage-dependent calcium channel gamma-8 subunit                       | Cacng8   | 0 | 5 | 0 | 0  | √ |   | 10.0<br>0 |
| Calsyntenin-1                                                           | Clstn1   | 0 | 5 | 0 | 1  | √ |   | 5.00      |

|                                                                     |          |   |   |   |    |   |   |      |
|---------------------------------------------------------------------|----------|---|---|---|----|---|---|------|
| H(+)/Cl(-) exchange transporter 3                                   | Clcn3    | 0 | 5 | 0 | 1  | √ |   | 5.00 |
| Integrin beta-5                                                     | Itgb5    | 0 | 5 | 0 | 1  | √ |   | 5.00 |
| Seizure 6-like protein                                              | Sez6l    | 0 | 5 | 0 | 2  | √ |   | 2.50 |
| Crumbs homolog 2                                                    | Crb2     | 0 | 5 | 0 | 3  | √ |   | 1.67 |
| Galactosylgalactosylxylosylprotein 3-beta-glucuronosyltransferase 3 | B3gat3   | 0 | 5 | 0 | 3  | √ |   | 1.67 |
| Leucine-rich repeat-containing protein 8C                           | Lrrc8c   | 0 | 5 | 0 | 3  | √ |   | 1.67 |
| GDNF family receptor alpha-1                                        | Gfra1    | 0 | 5 | 0 | 4  | √ |   | 1.25 |
| Heparan sulfate 2-O-sulfotransferase 1                              | Hs2st1   | 0 | 5 | 0 | 4  | √ |   | 1.25 |
| Protein tyrosine phosphatase-like protein PTPLAD1                   | Ptplad1  | 1 | 5 | 0 | 4  | √ |   | 1.25 |
| Vesicular integral-membrane protein VIP36                           | Lman2    | 0 | 5 | 0 | 4  | √ |   | 1.25 |
| Galectin-1                                                          | Lgals1   | 0 | 5 | 0 | 7  | √ | √ | 0.71 |
| SLIT-ROBO Rho GTPase-activating protein 3                           | Srgap3   | 1 | 5 | 1 | 7  | √ | √ | 0.71 |
| Sodium-coupled neutral amino acid transporter 2                     | Slc38a2  | 0 | 5 | 0 | 10 | √ | √ | 0.50 |
| Disks large-associated protein 4                                    | Dlgap4   | 0 | 5 | 0 | 12 | √ | √ | 0.42 |
| Glutamate receptor 1                                                | Gria1    | 0 | 5 | 0 | 12 | √ | √ | 0.42 |
| Amyloid-like protein 1                                              | Aplp1    | 0 | 4 | 0 | 5  |   | √ | 0.80 |
| Golgi membrane protein 1                                            | Golm1    | 0 | 4 | 0 | 5  |   | √ | 0.80 |
| Leucine-rich repeat-containing protein 40                           | Lrrc40   | 0 | 4 | 0 | 5  |   | √ | 0.80 |
| Pumilio domain-containing protein C14orf21 homolog                  |          | 0 | 4 | 0 | 5  |   | √ | 0.80 |
| Transmembrane emp24 domain-containing protein 1                     | Tmed1    | 0 | 4 | 0 | 5  |   | √ | 0.80 |
| Glycoprotein endo-alpha-1,2-mannosidase-like protein                | Maneal   | 0 | 4 | 0 | 6  |   | √ | 0.67 |
| Major prion protein                                                 | Prnp     | 0 | 4 | 0 | 6  |   | √ | 0.67 |
| Frizzled-2                                                          | Fzd2     | 0 | 4 | 0 | 7  |   | √ | 0.57 |
| V-type proton ATPase 116 kDa subunit a isoform 2                    | Atp6v0a2 | 0 | 4 | 0 | 7  |   | √ | 0.57 |
| Neuroigin-1                                                         | Nlgn1    | 0 | 4 | 0 | 8  |   | √ | 0.50 |
| Transmembrane protein 33                                            | Tmem33   | 1 | 4 | 0 | 8  |   | √ | 0.50 |

|                                                                                        |          |   |   |   |    |  |   |      |
|----------------------------------------------------------------------------------------|----------|---|---|---|----|--|---|------|
| SPARC-related modular calcium-binding protein 1                                        | Smoc1    | 0 | 4 | 0 | 10 |  | √ | 0.40 |
| BEN domain-containing protein 3                                                        | Bend3    | 0 | 3 | 0 | 5  |  | √ | 0.60 |
| Glutamate receptor, ionotropic kainate 2                                               | Grik2    | 0 | 3 | 0 | 5  |  | √ | 0.60 |
| Monoacylglycerol lipase ABHD12                                                         | Abhd12   | 0 | 3 | 0 | 5  |  | √ | 0.60 |
| Reelin                                                                                 | Reln     | 1 | 3 | 0 | 5  |  | √ | 0.60 |
| Syndecan-3                                                                             | Sdc3     | 0 | 3 | 0 | 5  |  | √ | 0.60 |
| Thyroid adenoma-associated protein homolog                                             | Thada    | 0 | 3 | 0 | 6  |  | √ | 0.50 |
| Roundabout homolog 1                                                                   | Robo1    | 0 | 3 | 0 | 7  |  | √ | 0.43 |
| Pannexin-1                                                                             | Panx1    | 0 | 3 | 0 | 8  |  | √ | 0.38 |
| Ganglioside-induced differentiation-associated protein 1-like 1                        | Gdap1l1  | 0 | 3 | 0 | 9  |  | √ | 0.33 |
| KLRAQ motif-containing protein 1                                                       | Klraql   | 0 | 3 | 2 | 13 |  | √ | 0.23 |
| Plexin-A1                                                                              | Plxna1   | 0 | 3 | 0 | 13 |  | √ | 0.23 |
| Extracellular leucine-rich repeat and fibronectin type-III domain-containing protein 1 | Elfn1    | 0 | 2 | 0 | 5  |  | √ | 0.40 |
| Beta-hexosaminidase subunit beta                                                       | Hexb     | 1 | 2 | 1 | 6  |  | √ | 0.33 |
| Low-density lipoprotein receptor-related protein 4                                     | Lrp4     | 0 | 2 | 0 | 7  |  | √ | 0.29 |
| Uncharacterized protein C6orf174 homolog                                               |          | 0 | 2 | 1 | 8  |  | √ | 0.25 |
| Protein shisa-6-like                                                                   |          | 0 | 2 | 0 | 10 |  | √ | 0.20 |
| Uncharacterized protein C17orf68 homolog                                               |          | 0 | 2 | 0 | 11 |  | √ | 0.18 |
| BolA-like protein 1                                                                    | Bola1    | 0 | 1 | 0 | 5  |  | √ | 0.20 |
| Cadherin EGF LAG seven-pass G-type receptor 2                                          | Celsr2   | 0 | 1 | 0 | 5  |  | √ | 0.20 |
| Fibulin-2                                                                              | Fbln2    | 0 | 1 | 0 | 5  |  | √ | 0.20 |
| Discoidin, CUB and LCCL domain-containing protein 2                                    | Dcbld2   | 0 | 1 | 0 | 6  |  | √ | 0.17 |
| Transmembrane protein 132A                                                             | Tmem132a | 0 | 1 | 0 | 7  |  | √ | 0.14 |
| Zinc transporter SLC39A7                                                               | Slc39a7  | 1 | 1 | 0 | 7  |  | √ | 0.14 |
| TM2 domain-containing protein 2                                                        | Tm2d2    | 0 | 1 | 0 | 24 |  | √ | 0.04 |
| Frizzled-7                                                                             | Fzd7     | 0 | 0 | 0 | 5  |  | √ | 0.10 |
| Kelch repeat and BTB domain-containing protein 4                                       | Kbtbd4   | 0 | 0 | 0 | 6  |  | √ | 0.08 |

|                |        |   |   |   |   |  |   |      |
|----------------|--------|---|---|---|---|--|---|------|
| Liprin-alpha-3 | Ppfia3 | 0 | 0 | 0 | 7 |  | √ | 0.07 |
|----------------|--------|---|---|---|---|--|---|------|



## References

1. E. Saxon, C. R. Bertozzi, *Science*, 2000, **287**, 2007–2010.
2. S. Han, B. E. Collins, P. Bengtson, J. C. Paulson, *Nat. Chem. Biol.*, 2005, **1**, 93–97.
3. C. Besanceney-Webler, H. Jiang, T. Zheng, L. Feng, D. Soriano del Amo, W. Wang, L. M. Klivansky, F. L. Marlow, Y. Liu, P. Wu, *Angew. Chem. Int. Ed.*, 2011, **50**, 8051–8056.
4. X. Qian, Q. Shen, S. K. Goderie, W. He, A. Capela, A. A. Davis, S. Temple, *Neuron*, 2000, **28**, 69–80.
5. J. Rong, J. Han, L. Dong, Y. Tan, H. Yang, L. Feng, Q.-W. Wang, R. Meng, J. Zhao, S.-Q. Wang, et al., *J. Am. Chem. Soc.*, 2014, **136**, 17468–17476.
6. J. A. Collins, C. A. Schandl, K. K. Young, J. Vesely, M. C. Willingham, *J. Histochem. Cytochem.*, 1997, **45**, 923–934.
7. G. Diez-Roux, S. Banfi, M. Sultan, L. Geffers, S. Anand, D. Rozado, A. Magen, E. Canidio, M. Pagani, I. Peluso, et al., *PLoS Biol.*, 2011, **9**, e1000582.
8. J. Aprea, S. Prenninger, M. Dori, T. Ghosh, L.S. Monasor, E. Wessendorf, S. Zocher, S. Massalini, D. Alexopoulou, M. Lesche, et al., *EMBO J.*, 2013, **32**, 3145–3160.
